# **Oxalic acid binds to gustatory receptor Gr23a and inhibits feeding in the brown planthopper**

Kui Kang<sup>1,2†</sup>, Mengyi Zhang<sup>1†</sup>, Lei Yue<sup>1</sup>, Weiwen Chen<sup>1</sup>, Yangshuo Dai<sup>1</sup>, Kai Lin<sup>1</sup>, Kai Liu<sup>1</sup>, Jun Lv<sup>1</sup>, Zhanwen Guan<sup>1</sup>, Shi Xiao<sup>1</sup>, Wenqing Zhang<sup>1\*</sup>

<sup>1</sup>State Key Laboratory of Biocontrol and School of Life Sciences, Sun Yat-sen University, Guangzhou 510275, Guangdong, China. <sup>2</sup>College of Biology and Agriculture, Zunyi Normal University, Zunyi 563006, Guizhou, China. <sup>†</sup>These authors contributed equally to this work. \*Corresponding author. Tel: + 86 20 39332963; E-mail: lsszwq@mail.sysu.edu.cn

**Keywords:** ligand identification / gustatory receptor / antifeedant / aversive behaviour / oxalic acid

## 15 **Abstract**

16 Plants produce diverse secondary compounds as natural protection against microbial  
17 and insect attack. Most of these compounds, including bitters and acids, are sensed by  
18 insect gustatory receptors (Grs). Acids are potentially toxic to insects, but there are  
19 few reports on sour compounds as ligands of insect Grs. Here, using two different  
20 heterologous expression systems, the insect Sf9 cell line and the mammalian  
21 HEK293T cell line, we started from crude extracts of rice (*Oryza sativa*) and  
22 successfully identified oxalic acid (OA) as a ligand of NlGr23a, a Gr in the brown  
23 planthopper *Nilaparvata lugens*. The antifeedant effect of OA on the brown  
24 planthopper was dose dependent, and *NlGr23a* is essential for OA's antifeedant  
25 activity in both artificial diets and rice plants. *NlGr23a* is also indispensable for tarsal  
26 OA sensing. To our knowledge, OA is the first identified ligand starting from plant  
27 crude extracts and the first known strong acid for insect Grs. These findings on  
28 rice-planthopper interactions will be of broad interest for pest control in agriculture  
29 and also for better understanding of how insects select host plants.

30 **Research organism:** *Nilaparvata lugens*

## 32 **Introduction**

33 Plant visual and chemical cues are important for host location and host acceptance of  
34 phytophagous insects. The cabbage root fly, *Delia radicum*, makes use of leaf colors  
35 to discriminate among host plants (Prokopy *et al.*, 1983). Host selection in  
36 oligophagous species is involved with the balance of phagostimulatory and deterrent  
37 inputs with the addition of a specific chemical sign stimulus (Chapman, 2003).  
38 Understanding the mechanisms underlying this selection strategy is of practical  
39 importance in agriculture for pest control. For instance, tandem deployment of the  
40 napier grass, which attracts more oviposition by stemborer moths than maize but not  
41 suitable for survival, and the molasses grass, which causes over 80% reduction in  
42 stemborer infestation of maize, can interfere host selection by stemborers (Khan *et al.*,  
43 2014). The combination of stimuli that have negative effects on food selection by  
44 pests and positive effects on diverting pests from the protected resource to a trap can

reduce pest abundance on the protected resource, which is called the push-pull strategy (Cook *et al.*, 2007). Plant-derived antifeedants can be used as push components of the push-pull strategy (Cook *et al.*, 2007). Identification of receptors sensing these chemicals will definitely improve our understanding of how insects select host plants.

To date, most identified antifeedants are secondary metabolites, which are toxic or deterrent to insects (Yoshihara *et al.*, 1980; Chapman, 2013; Douglas, 2017). As an example, oxalic acid (OA), the simplest dicarboxylic acid common in plant tissues, provides protection for plants against insects and foraging animals, including the brown planthopper (BPH) and aphids (Massonie, 1980; Yoshihara *et al.*, 1980; Karatolos and Hatcher, 2008). Some antifeedants (e.g. tricin) could be even used as indicators of crop resistance to target insect pests, and are therefore potentially valuable for breeding resistant crop varieties (Zhang *et al.*, 2015).

In insects, gustatory receptor neurons (GRNs), mainly found in gustatory sensilla, are able to convert the chemical signal into an electrical one, and transmit it to higher-order brain structures for processing, which in turn dictates behaviour (Scott, 2018). Secondary compounds as deterrents stimulate a subset of bitter GRNs, which then inhibit feeding activity or induce repulsion (Chapman, 2003). Different secondary metabolites elicited different responding patterns of GRNs in the two *Helicoverpa* species might mediate the dietary acceptance and host range (Sun *et al.*, 2021). With the decoding and publication of the genomes of *Drosophila melanogaster* and other insect species, fruitful molecular studies on insect gustation have been enabled. Gustatory receptors (Grs), expressed in GRNs, are required for responses to specific tastants. Grs mainly include sweet, bitter and CO<sub>2</sub> receptors (Liman *et al.*, 2014). Although diverse sugars and bitter compounds have been identified as ligands of insect Grs (Chen and Dahanukar, 2020), many Grs have yet to be functionally annotated, particularly the Grs sense acids. DmGr64e in *D. melanogaster* was reported to sense fatty acids such as hexanoic acid and octanoic acid (Kim *et al.*, 2018). However, there are currently no reports of strong acid as ligands of insect Grs.

The BPH *Nilaparvata lugens*, causing extensive damage by sap feeding and transmitting viruses, feeds solely on cultivated rice and its allied wild forms such as *Oryza perennis* and *O. spontanea* (Sogawa, 1982). Its gustatory sensilla are mainly located in the small passageway leading from the food duct to the cibarium and the stylet groove on the labial tip, and probably regulate the initial stages of probing and in the maintenance of sap ingestion (Foster *et al.*, 1983a; Foster *et al.*, 1983b). In our previous study, 32 of *N. lugens* Gr sequences (*NIGr*s) were obtained following analyses of the BPH genome and transcriptomes (Kang *et al.*, 2018). Here, we selected a functionally unknown gene, *NIGr23a*, which is related to BPH fecundity. Through a multi-stage bioassay-directed fractionation of rice crude extracts, we identified OA as a ligand of *NIGr23a*. We also found that *NIGr23a* is essential to the antifeedant activity of OA in both artificial diets and rice plants and the modulation of the tarsal repulsion for OA. To our knowledge, OA is the first identified ligand starting from plant crude extracts, as well as the first known strong acidic ligand for insect Grs.

## Results

### Oxalic acid is a ligand of *NIGr23a*

To identify the specific ligand of *NIGr23a*, we cloned the full-length *NIGr23a* open reading frame (GenBank accession No. MT387198), which encodes 451 amino acid residues with seven predicted transmembrane domains (see Appendix 1—figure 1A). Then *NIGr23a*-expressing stable *Spodoptera frugiperda* (Sf9) cell line was established by antibiotic selection for at least 10 passages. Expression of the stably transfected gene was verified by immunoblotting and RT-PCR (see Appendix 1—figures 1B and C).

We carried out 4 rounds of ligand screening to search for potential ligands of *NIGr23a* from crude extracts of rice stems and leaves. The initial calcium imaging results revealed that the ethyl acetate (EAC) and methyl alcohol (MeOH) fractions caused significantly higher calcium ion release/concentration (i.e. cellular response) as indicated by the ratio of cytoplasmic fluorescence intensities (Figure 1A). The

EAC fraction was then further fractionated into three portions for the next round of screening; Sf9 cells expressing *NIGr23a* showed a response only to fraction 2 (time of retention,  $t_R = 20\text{--}35$  min, Figure 1B and see also Appendix 1—figure 2A for HPLC chromatogram of the EAC fraction). This fraction was subjected to further fractionation with acetonitrile (ACN) and we found that only the subfraction collected in 5–10 min specifically evoked  $\text{Ca}^{2+}$  release (Figure 1C and see also Appendix 1—figure 2B for HPLC chromatogram of the subfraction). The bioassay-positive subfraction was isolated and analysed using gas chromatography-mass spectrometry (GC-MS). Four compounds, oxalic acid (OA), glycerol, phthalic acid, and trisiloxane, were identified (Figure 1D and see also Appendix 1—figure 2C for GC-MS chromatogram of the control solution). As the peak intensity of phthalic acid was quite weak, and trisiloxane was probably an artefact of culture vessel silanization (see Appendix 1—table 1 for the GC-MS analysis details), OA and glycerol were selected as potential ligands. Tests using commercial OA and glycerol showed that *NIGr23a*-Sf9 cells responded dramatically to OA stimulation (Figure 1E).

In addition, expressing *NIGr23a* in the human embryonic kidney 293T (HEK293T) cells also allowed these cells to respond to OA. This suggests that *NIGr23a* showed full functionality in Sf9 cells without an insect-specific co-receptor (Figure 1F). The responses elicited by the HEK293T cells increased with higher acid concentrations and were inversely correlated with pH of OA solution (Figs 1G and H). Microscale thermophoresis assay, which has been used to measure binding affinities, supported the results that *NIGr23a* interacts with OA. As seen in Figure 1—figure supplement 1A, when *NIGr23a*-GFP was mixed with different concentrations of glycerol, there was no fluorescence migration change after laser irradiation, suggested that the binding state of *NIGr23a* did not change by glycerol, whereas when *NIGr23a*-GFP was mixed with different concentrations of OA, the fluorescence migration via laser irradiation gradually decreased as the concentration of OA increases. Thus, OA was shown to be a ligand of *NIGr23a*. As *NIGr23a* interacted with bioactive molecules in the MeOH fraction, *NIGr23a* may also have non-OA ligands in rice (Figure 1A). To characterize the response profiles of *NIGr23a*, we tested responsiveness of the

NIGr23a-expressing HEK293T cells to ten additional phytochemicals. Stimulation with only benzoic acid induced a  $\text{Ca}^{2+}$  increase, whereas stimulation with other organic acids, which have shown inhibitory effects against BPHs, elicited no response (Yoshihara *et al.*, 1980) (Figure 1—figure supplement 1B). No response was also observed in sucrose, various bitter compounds and HCl (Figure 1—figure supplement 1B). Hence, NIGr23a may mediate carboxylic acids sensing in a structure dependent manner.

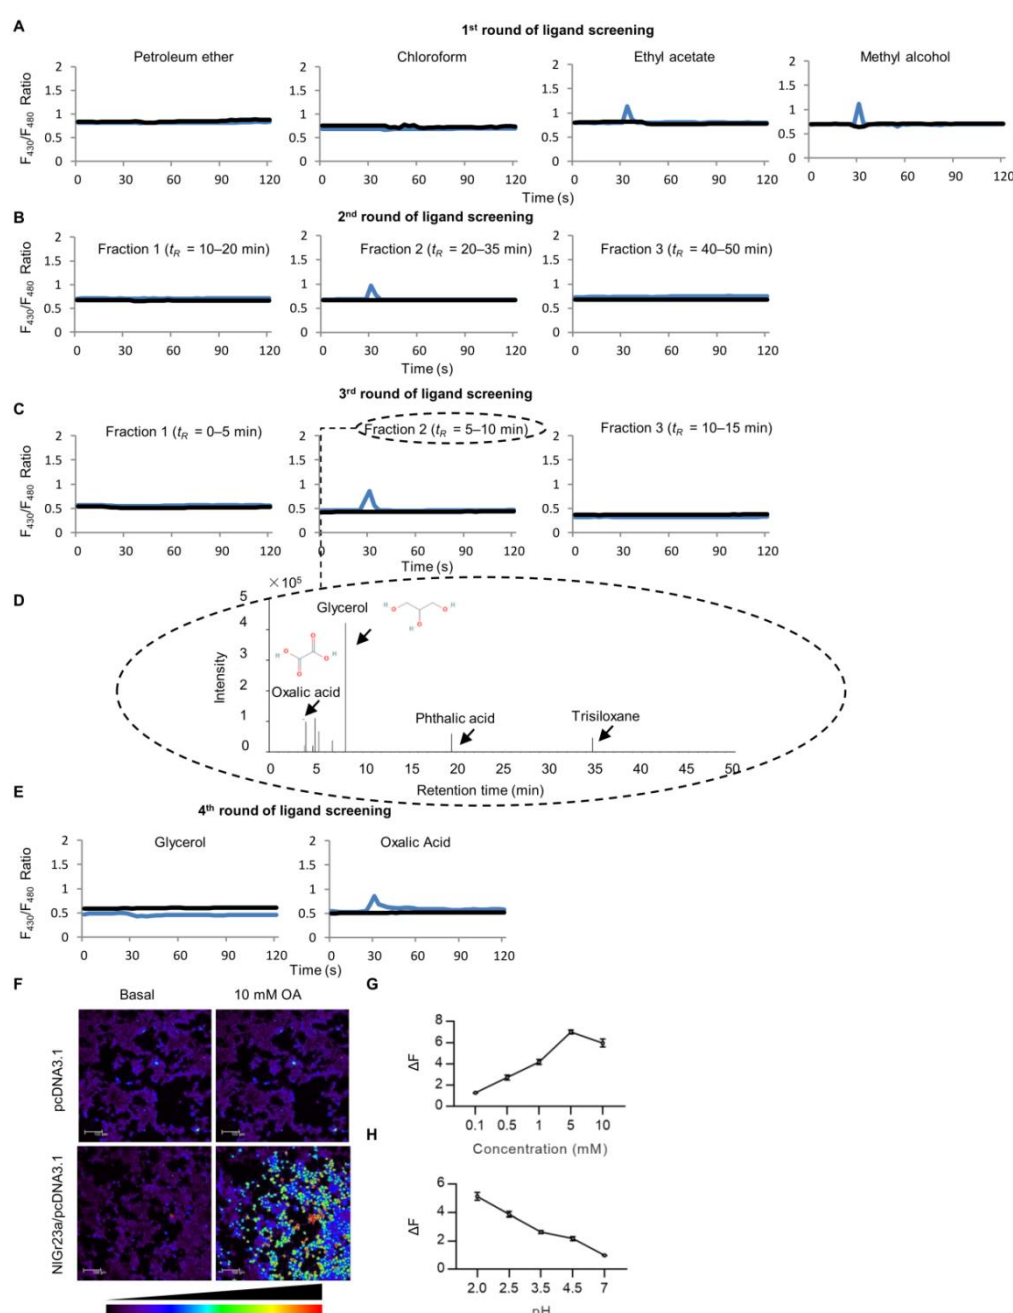

# **Figure 1. Oxalic acid is a ligand of NlGr23a.**

(A) Round 1 of ligand determination. The responses of Sf9 cells transfected with plasmid construct pIZ-NlGr23a-V5-His (blue lines) or pIZ-V5-His (black lines) vector to different fractions and tastants were analysed by calcium imaging. The changes in intracellular  $\text{Ca}^{2+}$  indicated by the ratio of  $F_{340}/F_{380}$  in Fura-2 AM loaded cells in response to fractions of the crude extract obtained with petroleum ether (PE), chloroform ( $\text{CHCl}_3$ ), ethyl acetate (EAC) and methyl alcohol (MeOH) were measured using microscopy. Test solutions are shown above each figure. Each curve represented one cell responding to a specific tastant.

(B) Round 2 of ligand determination. Representative traces evoked by three semi-preparative high-performance liquid chromatographic (semi-prep-HPLC) fractions separated from the EAC fraction. See Appendix 1—figure 2A for HPLC chromatogram of the EAC fraction.

(C) Round 3 of ligand determination. Representative traces evoked by three semi-prep-HPLC fractions separated from the bioassay-positive fraction from round 2 of ligand screening. See Appendix 1—figure 2B for HPLC chromatogram of the bioassay-positive subfraction.

(D) GC-MS chromatogram of bioassay-positive fraction from round 3 of ligand screening. Arrowheads indicate substances identified in the bioassay-positive fraction. See Appendix 1—figure 2C for GC-MS chromatogram of the control solution and Appendix 1—table 1 for the retention time and response intensity of each compound. Chemical structure of oxalic acid (OA, PubChem CID: 971) and glycerol (PubChem CID: 753) were obtained from *PubChem* (<https://pubchem.ncbi.nlm.nih.gov>).

(E) Round 4 of ligand determination. Representative traces evoked by 5 mM glycerol and 5 mM OA.

(F) Cytoplasmic  $\text{Ca}^{2+}$  imaging of the HEK293T cells expressing NlGr23a. Upper: the pcDNA3.1 transfected HEK293T cells. Lower: the NlGr23a/pcDNA3.1 transfected HEK293T cells. Left: Fluorescence image before 10 mM OA perfusion. Right: Fluorescence image after 10 mM OA perfusion. White scale bar indicates 100  $\mu\text{m}$ . The color scale indicates the cytoplasmic fluorescence ratio.



(G)  $\text{Ca}^{2+}$  response of the NlGr23a-HEK293T cells ( $n = 50$ ) stimulated with various concentrations of OA solutions.  $\Delta F$  represented the values of  $F_{340}/F_{380}$  ratio, which were set to 1 before the addition of the OA solution. Bars represent means  $\pm$  SEM.

(H)  $\text{Ca}^{2+}$  response of the NlGr23a-HEK293T cells ( $n = 50$ , except for pH = 4.5, where  $n = 27$ ) stimulated with 10 mM OA at different pH.  $\Delta F$  represented the values of  $F_{340}/F_{380}$  ratio, which were set to 1 before the addition of the compound. pH was adjusted using NaOH. Bars represent means  $\pm$  SEM.

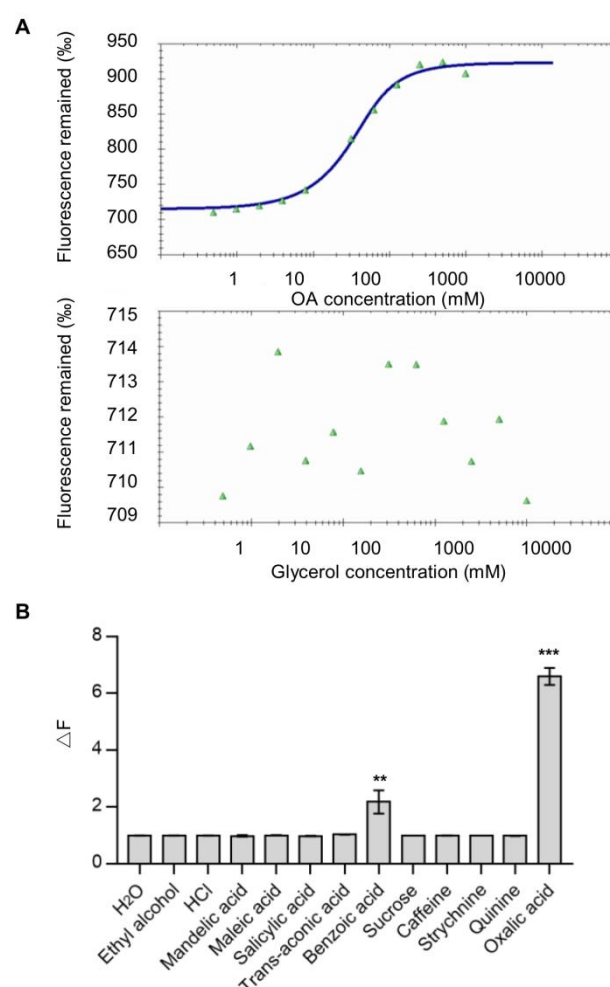

**Figure 1—figure supplement 1. Verification of interaction between NlGr23a and oxalic acid (OA) and response profiles of the HEK293T cells expressing NlGr23a.**

(A) Verification of interaction between NlGr23a and OA using microscale thermophoresis. Top: The interaction of NlGr23a-GFP with OA. Bottom: The



## Appendix 1

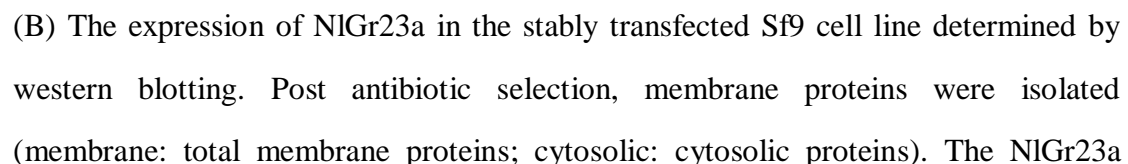

expression was detected by the anti-V5 antibody. For membrane proteins visualization, the antibody against  $\beta$ -actin was used as the loading control. Stripping protocol was performed using western blot stripping buffer on the same membrane to obtain  $\beta$ -actin signal. NIGr23a/pIZ-V5-His represents pIZ-NIGr23a-V5-His vector transfected cells. CK represents non-transfected cells and pIZ-V5-His represents pIZ-V5-His vector transfected cells as the negative controls.

(C) The expression of *NIGr23a* in the stably transfected Sf9 cell line examined by RT-PCR. Post antibiotic selection, RNA from the transfected Sf9 cells was isolated and subjected to RT-PCR analysis of *NIGr23a* transcription.

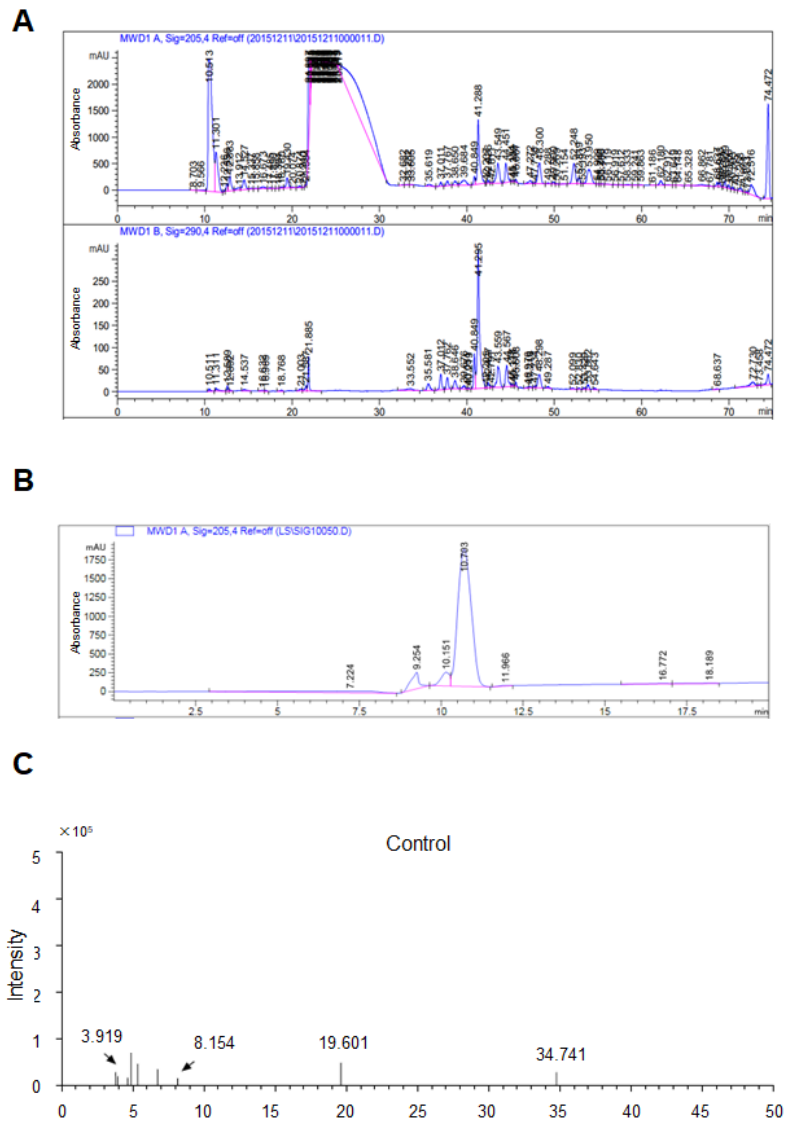

## Appendix 1—figure 2. Isolation and identification of rice crude extracts.

(A) HPLC chromatogram of the ethyl acetate fraction. The UV detection wavelengths were set at 205 nm (top) and 290 nm (bottom).

(B) HPLC chromatogram of bioassay-positive fraction from round 2 of ligand screening. The UV detection wavelength was set at 205 nm.

(C) GC-MS chromatogram of the control solution.

| Retention time (min) |        | Intensity |        | Name          |
|----------------------|--------|-----------|--------|---------------|
| Control              | Sample | Control   | Sample |               |
| 3.919                | 3.909  | 22228     | 100977 | Oxalic acid   |
| 8.154                | 8.144  | 18117     | 445691 | Glycerol      |
| 19.601               | 19.581 | 51353     | 62489  | Phthalic acid |
| 34.741               | 34.691 | 31094     | 48765  | Trisiloxane   |

## Appendix 1—table 1. Identification of differential peaks by GC-MS.

### *NlGr23a* is essential to the antifeedant activity of oxalic acid

BPH adults offered artificial diets either containing (+OA) or missing OA (-OA) with no alternative (“no-choice” tests) showed significantly lower acceptance of +OA compared to -OA after 1.5 h exposure (Figure 2A). When offered a choice (“dual-choice”), +OA food was avoided in favour of -OA food, based on insect positioning relative to the food sources (position index, PI = -0.52, Figure 2B). The electrical penetration graph (EPG) technique, which can discriminate between feeding behaviours by producing different waveforms, was used to investigate the effect of OA on BPH feeding behaviour. Three such waveforms occurred sequentially during the process of BPH feeding on liquid diet sacs (LDS): NP (non-penetration), PW (pathway wave), and N4 (artificial diet ingestion) (Figure 2C, top). At 100  $\mu$ M OA in the diet (+OA), the pre-feeding phases were longer than those of the control (-OA) and the N4 phase was very significantly shorter (Figure 2C, bottom). OA, even at a low concentration, was thus capable of interfering food sucking behaviour. The proportion of time spent feeding fell further as OA concentrations increased, down to only 0.56% at an OA concentration of 10 mM (Figure 2C, bottom).

Further, we added two different food dyes into sucrose solutions with or without OA to measure direct feeding. BPHs were given a choice between 2% (w/v) sucrose and 10% sucrose plus different concentrations of OA. Sucrose is a potent sucking stimulant for BPH (Sogawa, 1982). In the absence of OA, the insects showed a preference for the 5-fold higher concentration of sucrose (Figure 2D). However, when the higher concentration of sucrose was contaminated with OA, BPHs avoided the OA-laced food in a dose dependent manner (Figure 2D). A similar experiment was conducted using an equal concentration of sucrose (10%), BPHs showed similar preference for 10% sucrose solutions added with different food dyes without OA and exhibited repulsion to the food when it was mixed with OA (Figure 2—figure supplement 1A). In addition, BPHs consumed significantly less food containing much less concentration of OA (100  $\mu$ M) compared to the control (Figure 2—figure supplement 1B). These results indicated that the antifeedant activity of OA was dose dependent. To exclude the possibility of olfaction mediated OA sensing, we surgically removed the primary olfactory organs of BPH, the second and third antennal segments (Aljunid and Anderson, 1983). Antennaectomized insects were normal for OA avoidance (Figure 2—figure supplement 1C). Thus, olfactory system is not required for OA avoidance.

As OA was a ligand of the *NIGr23a* receptor, we hypothesised that the antifeedant activity of OA is dependent on this receptor. The *NIGr23a* gene was therefore silenced using RNA interference (RNAi) *in vivo*. *NIGr23a* expression in the whole insect was decreased significantly 24 to 72 h post-injection (Figure 2—figure supplement 2A). Additionally, *NIGr23a* mRNA levels in primary gustatory organs at 48 h post injection substantially decreased compared to the negative controls (Figure 2—figure supplement 2B). As the tissue amount of tarsus was insufficient for RNA extraction, we extracted RNA from legs to detect the gene silencing efficiency. As expected, the antifeedant activity of OA was decreased in *NIGr23a*-inactive insects compared to the control insects injected with green fluorescent protein (*GFP*) double-stranded RNA (dsRNA) in no-choice tests. In BPHs fed -OA artificial diets, the level of food acceptance was nearly the same for both treated (ds*NIGr23a*) and control (ds*GFP*)

groups (Figure 2E, top). In insects fed +OA diets, those with silenced *NlGr23a* spent more time on the OA-containing food than controls, significantly so between 1.5 h and 2.5 h after exposure (Figure 2E, bottom). In the dual-choice assays, a decrease in OA's antifeedant effectiveness was also observed. BPHs injected with *dsNlGr23a* were less sensitive to OA (PI=-0.28) than controls (PI=-0.48, Figure 2F). When BPHs fed on diets without OA, the NP duration was higher and the N4 duration was commensurately lower in *NlGr23a*-silenced insects (Figure 2G, left), which indicated that RNAi against *NlGr23a* influenced their feeding behaviour. At 10 mM OA, *NlGr23a*-silenced BPHs exhibited significantly more N4 and PW phases and fewer NP phases than controls (Figure 2G, right). Similar results were observed at 2 mM or 5 mM OA (Figure 2—figure supplement 2C). Additionally, knockdown of *NlGr23a* dramatically reduced OA feeding avoidance (Figure 2H). Taken together, these results indicated that *NlGr23a*-silenced BPHs were less sensitive to OA.

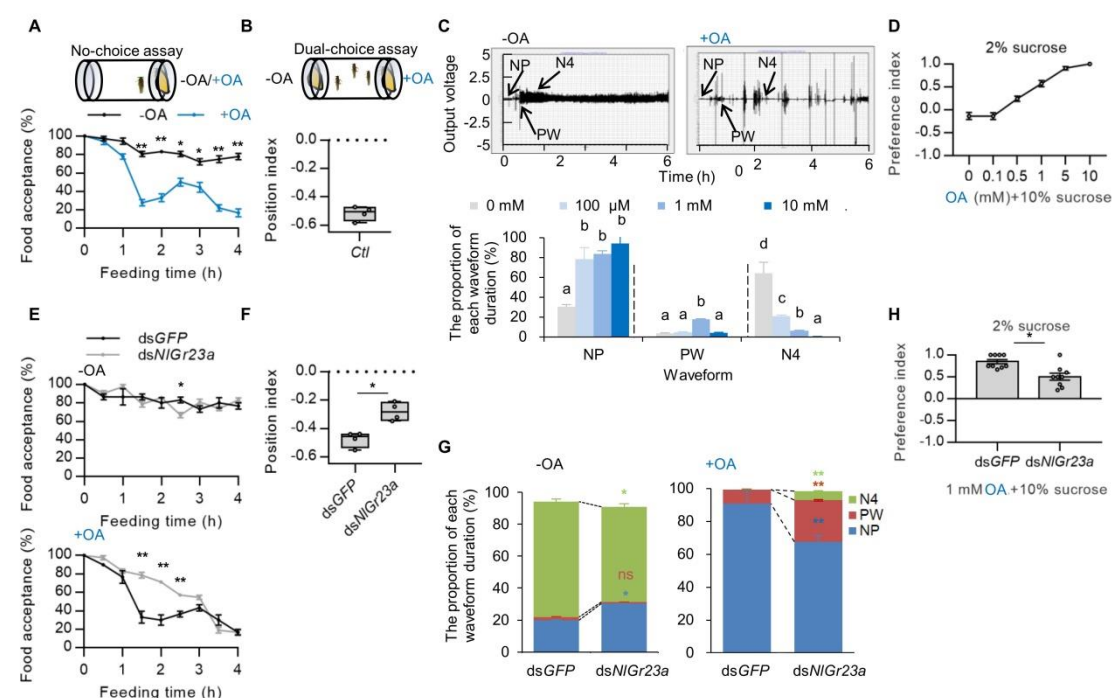

**Figure 2. Effects of *NlGr23a* on the antifeedant activity of oxalic acid.**

(A) Top: Schematic representation of the experimental apparatus used for no-choice test. Bottom: The proportion of BPHs accepting artificial diets without (-OA, in black)

or with 100  $\mu$ M OA (+OA, in blue) as food in no-choice test. The data represent means  $\pm$  SEM. *t*-test; \**P* < 0.05; \*\**P* < 0.01 (*n* = 3).

(B) Top: Schematic representation of the experimental apparatus used for dual-choice test. Bottom: Collective data (*n* = 4) of the position index (PI) of the laboratory insects (*Ctl*) in response to food containing 100  $\mu$ M OA in dual-choice assays.

(C) Top: Overall typical view of electrical penetration graph (EPG) waveforms generated by the feeding behaviours of BPH on liquid diet sacs (LDS) without (top) or with (bottom) 100  $\mu$ M OA. There are three typical waveforms: non-penetration (NP), pathway (PW), and ingestion (N4). Bottom: The duration of each EPG waveform as a proportion of observation time produced by BPHs on LDS containing artificial diets with different concentrations of OA. Bars represent means + SEM. Different lowercase letters above columns represent significant differences at *P* < 0.05 from Duncan's multiple range test (*n* = 5).

(D) Dose-responsive food choice assay for OA. BPHs were given the choice between 2% sucrose solution and 10% sucrose with different concentrations of OA. The data represent means  $\pm$  SEM (*n* = 8).

(E) Top: The proportion of insects accepting artificial food in absent of OA (-OA) among *dsGFP*-treated (black line) or *dsNlGr23a*-treated (grey line) BPHs in no-choice tests. Bottom: The proportion of insects accepting artificial food with 100  $\mu$ M OA (+OA) among *dsGFP*-treated or *dsNlGr23a*-treated BPHs in no-choice tests. The data represent means  $\pm$  SEM. *t*-test; \**P* < 0.05; \*\**P* < 0.01 (*n* = 3).

(F) PI values of *dsNlGr23a*-treated and *dsGFP*-treated BPHs in response to +OA diets in dual-choice assays. *t*-test; \**P* < 0.05 (*n* = 4).

(G) The duration of each EPG waveform as a proportion of observation time produced by *dsGFP*-treated and *dsNlGr23a*-treated BPHs on LDS with or without 10 mM OA. Stacked bar graphs represent means + SEM. *t*-test; ns, *P* > 0.05; \**P* < 0.05; \*\**P* < 0.01 (*n* = 5).

(H) Food choice assay for *dsNlGr23a*-treated and *dsGFP*-treated BPHs. 1 mM OA was mixed with 10% sucrose. Bars represent means  $\pm$  SEM. *t*-test; \**P* < 0.05 (*n*  $\geq$  7).

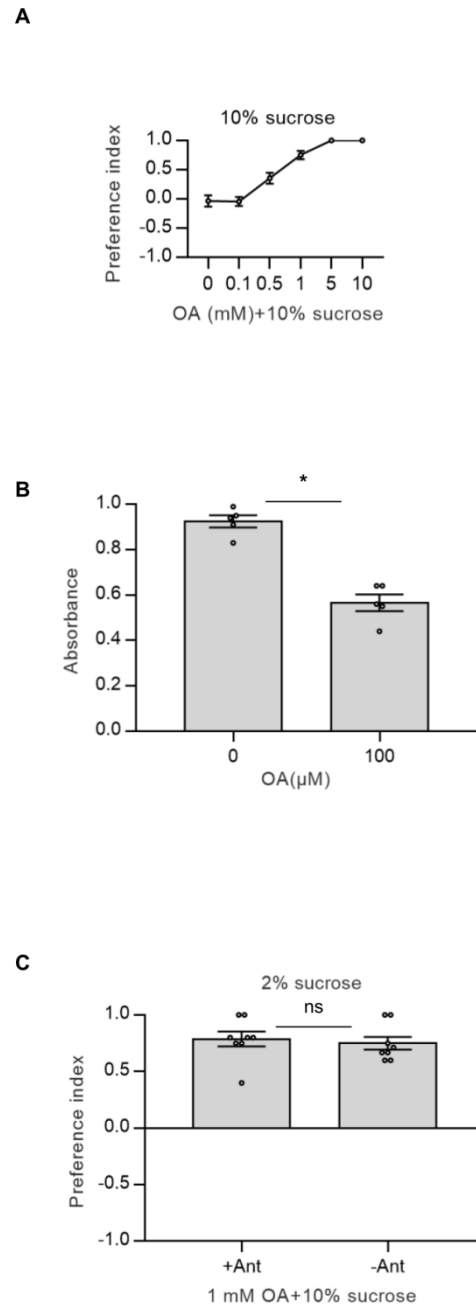

**Figure 2—figure supplement 1. OA induced feeding avoidance.**

(A) Dose-responsive food choice assay for OA using an equal concentration of sucrose. BPHs were given the choice between 10% sucrose solution and 10% sucrose with different concentrations of OA. The data represent means  $\pm$  SEM. ( $n \geq 8$ ).

(B) Effect of OA on food ingestion. Amount of ingestion was calculated using spectrophotogram analysis for diets with or without 100  $\mu$ M OA. Bars represent means  $\pm$  SEM. *t*-test; \* $P < 0.05$  ( $n = 5$ ).



(C) Role of olfaction in OA avoidance. Bars represent means  $\pm$  SEM. *t*-test; ns, *P* > 0.05 (n=8).

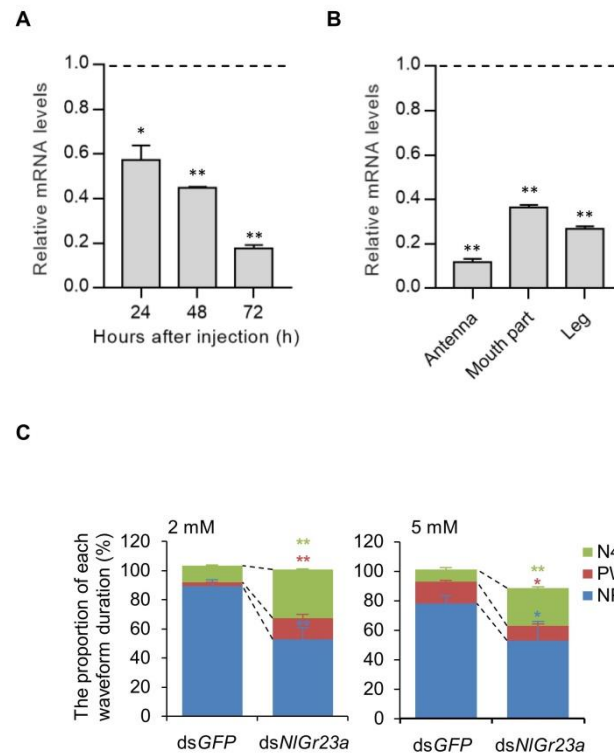

**Figure 2—figure supplement 2. Electrical penetration graph results for BPHs feeding on liquid diet sacs (LDS) after *NIGr23a* silencing and OA content in different rice varieties.**

(A) The messenger RNA (mRNA) levels of *NIGr23a* in BPH 24, 48 and 72 h after injection of *NIGr23a* dsRNA. All mRNA levels were normalized relative to the  $\beta$ -actin mRNA levels. The mRNA level of *GFP* was set to 1. Bars represent means  $\pm$  SEM. *t*-test; \**P* < 0.05; \*\**P* < 0.01 (n = 3).

(B) The mRNA levels of *NIGr23a* in primary gustatory organs at 48 h post injection of *NIGr23a* dsRNA. All mRNA levels were normalized relative to the  $\beta$ -actin mRNA levels. The mRNA level of *GFP* was set to 1. Bars represent means  $\pm$  SEM. *t*-test; \*\**P* < 0.01 (n=3).

(C) The duration of each waveform as a proportion of observation time produced by ds*NIGr23a*- and ds*GFP*- treated BPHs on LDS containing artificial diets with 2 mM

or 5 mM OA. Stacked bar graphs represent means + SEM. *t*-test; \**P* < 0.05; \*\**P* < 0.01 (n = 5).

## Appendix 2

| Primer name                 | Sequence (5'-3')                                    |
|-----------------------------|-----------------------------------------------------|
| <i>NlGr23a</i> -ORF-F       | ATGCTGAAAAATAAAAGGTTGCAATC                          |
| <i>NlGr23a</i> -ORF-R       | CTCGAGAGACTGATATTGCTGTT                             |
| <i>NlGr23a-HindIII</i> -F   | CCCAAGCTTATGCTGAAAAATAAAAGGTTGCAATC                 |
| <i>NlGr23a-EcoRI</i> -R     | CGGAATTCCCTCGAGAGACTGATATTGCTGTT                    |
| <i>NlGr23a</i> -dsRNA-F     | TTACCATTTTTGGACTGGACTA                              |
| <i>NlGr23a</i> -dsRNA-R     | ACTGCAGTTAAAGTTGATATT                               |
| T7- <i>NlGr23a</i> -dsRNA-F | GGATCCTAATACGACTCACTATAGGTTACCATTTTTG<br>GACTGGACTA |
| T7- <i>NlGr23a</i> -dsRNA-R | GGATCCTAATACGACTCACTATAGGACTGCAGTTAAA<br>GTTGATATT  |
| <i>NlGr2</i> -dsRNA-F       | CACTTCATCTACTTGATGTCCG                              |
| <i>NlGr2</i> -dsRNA-R       | ATCTCTTATTTCTGCTTGTTTC                              |
| T7- <i>NlGr2</i> -dsRNA-F   | GGATCCTAATACGACTCACTATAGGCACTTCATCTAC<br>TTGATGTCCG |
| T7- <i>NlGr2</i> -dsRNA-R   | GGATCCTAATACGACTCACTATAGGATCTCTTATTTCT<br>GCTTGTTTC |
| <i>NlGr11</i> -dsRNA-F      | CGCAGACTTGAACAAAGGACCG                              |
| <i>NlGr11</i> -dsRNA-R      | GTGGTCCATAGATGCGTATAAT                              |
| T7- <i>NlGr11</i> -dsRNA-F  | GGATCCTAATACGACTCACTATAGGCGCAGACTTGA<br>ACAAAGGACCG |
| T7- <i>NlGr11</i> -dsRNA-R  | GGATCCTAATACGACTCACTATAGGGTGGTCCATAGA<br>TGCGTATAAT |
| <i>NlGr13</i> -dsRNA-F      | TTTTTGAGATTCGGAAGAATGT                              |
| <i>NlGr13</i> -dsRNA-R      | AGTGTGGTATGGTGTGCGAGGGA                             |
| T7- <i>NlGr13</i> -dsRNA-F  | GGATCCTAATACGACTCACTATAGGTTTTTGAGATTC<br>GGAAGAATGT |
| T7- <i>NlGr13</i> -dsRNA-R  | GGATCCTAATACGACTCACTATAGGAGTGTGGTATGG<br>TGTCGAGGGA |
| <i>NlGr15</i> -dsRNA-F      | TTCCCAAAAACACCAAGC                                  |
| <i>NlGr15</i> -dsRNA-R      | TCAATTTCTCAGGCCA                                    |
| T7- <i>NlGr15</i> -dsRNA-F  | GGATCCTAATACGACTCACTATAGGTTCCCAAAAAC<br>ACCAAGC     |
| T7- <i>NlGr15</i> -dsRNA-R  | GGATCCTAATACGACTCACTATAGGTCAATTTCTCTCA<br>CAGCCA    |
| <i>NlGr17</i> -dsRNA-F      | GAAGGGCTACACCTGCACTT                                |
| <i>NlGr17</i> -dsRNA-R      | GCAGAACAACACCGACACAC                                |

| Primer name                | Sequence (5'-3')                                    |
|----------------------------|-----------------------------------------------------|
| T7- <i>NI</i> Gr17-dsRNA-F | GGATCCTAATACGACTCACTATAGGGAAGGGCTACA<br>CCTGCACTT   |
| T7- <i>NI</i> Gr17-dsRNA-R | GGATCCTAATACGACTCACTATAGGGCAGAACAAACA<br>CCGACACAC  |
| <i>NI</i> Gr18-dsRNA-F     | GGAAAATATTGTGTTACTGG                                |
| <i>NI</i> Gr18-dsRNA-R     | ATTGATACCACATCGCTGAT                                |
| T7- <i>NI</i> Gr18-dsRNA-F | GGATCCTAATACGACTCACTATAGGGGAAAATATTGT<br>GTTA CTGG  |
| T7- <i>NI</i> Gr18-dsRNA-R | GGATCCTAATACGACTCACTATAGGATTGATACCACA<br>TCGCTGAT   |
| <i>NI</i> Gr21-dsRNA-F     | TTTGTCATTGTTGAAGGGCTAC                              |
| <i>NI</i> Gr21-dsRNA-R     | ATACTTTGAGATTTGAGGTGGG                              |
| T7- <i>NI</i> Gr21-dsRNA-F | GGATCCTAATACGACTCACTATAGGTTTGTCATTGTT<br>GAAGGGCTAC |
| T7- <i>NI</i> Gr21-dsRNA-R | GGATCCTAATACGACTCACTATAGGATACTTTGAGAT<br>TTGAGGTGGG |
| <i>NI</i> Gr26-dsRNA-F     | ATGAGGGAAGGAGACGAAA                                 |
| <i>NI</i> Gr26-dsRNA-R     | TAGGAAGAAGTGAAAGCGC                                 |
| T7- <i>NI</i> Gr26-dsRNA-F | GGATCCTAATACGACTCACTATAGGATACTTTGAGAT<br>TTGAGGTGGG |
| T7- <i>NI</i> Gr26-dsRNA-R | GGATCCTAATACGACTCACTATAGGTAGGAAGAAGT<br>GAAAGCGC    |
| Q- $\beta$ -actin-F        | TGCGTGACATCAAGGAGAAGC                               |
| Q- $\beta$ -actin-R        | CCATACCCAAGAAGGAAGGCT                               |
| Q- <i>NI</i> Gr23a-F       | TAGGCAAGAAGTTTGTGGACAG                              |
| Q- <i>NI</i> Gr23a-R       | ATGAGATAAGTGAGACACCCGG                              |
| Q- <i>NI</i> Gr2-F         | GACCTCCACCTAGTGTCTCTG                               |
| Q- <i>NI</i> Gr2-R         | TCTGTAGCTGGGCCAACTTT                                |
| Q- <i>NI</i> Gr11-F        | TGTCTTGCCCTACCAAACGC                                |
| Q- <i>NI</i> Gr11-R        | GCAGCACCAGGTAGCCGAAT                                |
| Q- <i>NI</i> Gr13-F        | GCAGCCCTTATTCTTGAGCT                                |
| Q- <i>NI</i> Gr13-R        | ACAAGGCTGGCTAGAATGAATG                              |
| Q- <i>NI</i> Gr15-F        | TCACCGGAGCAAGTCTTCAT                                |
| Q- <i>NI</i> Gr15-R        | CCACATCCAAAACCCGTCTC                                |
| Q- <i>NI</i> Gr17-F        | CCCTGCCCAGATTTCGTTAC                                |
| Q- <i>NI</i> Gr17-R        | CGTGAGGAATATGAGCAGCG                                |
| Q- <i>NI</i> Gr18-F        | TTGTGGTTCTACGTGCGTTG                                |
| Q- <i>NI</i> Gr18-R        | ACCCAGATATTCCTCGCTTCA                               |
| Q- <i>NI</i> Gr21-F        | CTGTTTCTCTCCTCGCTCGA                                |
| Q- <i>NI</i> Gr21-R        | GATTCTGGCTCTCTTTGGCG                                |
| Q- <i>NI</i> Gr26-F        | GAGGTGCTTCATCAGAGGGA                                |
| Q- <i>NI</i> Gr26-R        | GACGATCTTGACAAGGCTGC                                |

## Appendix 2—table 1. Primers used in this study.

### *NlGr23a* is required for perception of oxalic acid in rice

To further verify above results in rice plants, we used the immersion method to increase the OA content of the rice variety TN1, resulting in 40% higher content in the OA-treated rice plants (TN1<sup>+OA</sup>) than in the untreated controls (Figure 3A). Insects fed TN1<sup>+OA</sup> showed a positional avoidance response (PI = -0.24) and made twice as many probing marks (caused by insects testing food for palatability and withdrawing) as those fed TN1, indicating that BPHs spent more time searching for food on TN1<sup>+OA</sup> (Figs 3B and 3D). There were also three main types of EPG waveforms occurred during the process of BPH feeding on a rice stem: NP (non-penetration), PW (pathway wave) and N4 (phloem ingestion). Compared to the control group reared on TN1, BPHs fed TN1<sup>+OA</sup> exhibited longer PW and shorter N4 durations, and thus less phloem ingestion (Figure 3F). Our analysis therefore indicated that BPH feeding was inhibited as the content of OA in rice plants increased.

The positional avoidance response disappeared in *dsNlGr23a*-treated BPHs (PI = 0.01) but not in *dsGFP*-treated insects (PI = -0.22) (Figure 3C). In addition, *dsGFP*-treated BPHs produced 77% more probing marks on TN1<sup>+OA</sup> rice plants than on TN1, but this difference also disappeared after injection of *NlGr23a* dsRNA (Figure 3E). EPG results further supported this phenomenon. The proportion of time in the N4 waveform was significantly lower and PW waveform was significantly higher when BPHs fed on TN1<sup>+OA</sup> in *dsGFP*-treated group, but this significant difference no longer existed after *NlGr23a* was silenced (Figure 3G). These results further confirmed that *NlGr23a* mediated OA perception in rice.

As we observed, the PI values in dual choice tests in rice tended to be higher than those from tests using the artificial diet containing OA (Figs 2B and 3B). There are three explanations. Firstly, in the case of the artificial diets, the diets either included or completely excluded OA, while in the case of rice plants, the OA content in TN1<sup>+OA</sup> was only 39% higher than in TN1 (Figure 3A). Secondly, BPHs tend to move up and down along the same plant instead of quickly moving to a different plant. Thirdly, rice

plants contain many metabolites including both deterrents and stimulants to feeding (Yoshihara *et al.*, 1980; Zhang *et al.*, 1999).

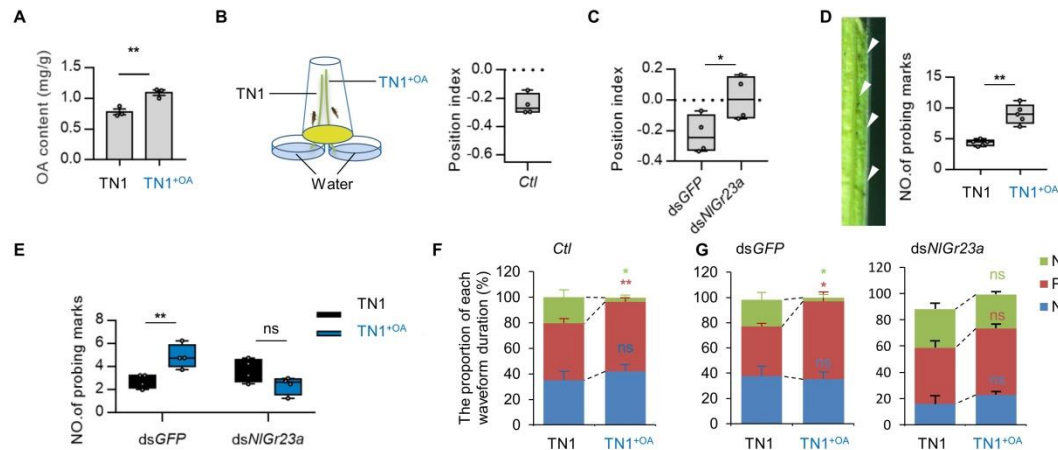

**Figure 3. Increased OA content in rice plant inhibited feeding behaviour of BPH.**

(A) OA content before and after immersion treatment in TN1. The TN1<sup>OA</sup> represented TN1 treated with 0.2% OA solution. Bars represent means  $\pm$  SEM. *t*-test; \*\**P* < 0.01 (*n* = 4).

(B) Left: Schematic representation of the experimental apparatus used for dual-choice test with rice plants. Right: Collective data (*n* = 4) of the position index (PI) of *Ctl* in response to TN1<sup>OA</sup>.

(C) PI values for *NIGr23a* dsRNA-treated and *GFP* dsRNA-treated BPHs in response to TN1<sup>OA</sup> in dual choice assays. *t*-test; \**P* < 0.05 (*n* = 4).

(D) Left: Probing marks left on the surface of a rice stem. Right: Collective data (*n* = 5) of the number of probing marks on the surface of TN1<sup>OA</sup> or TN1 after BPH infestation. *t*-test; \*\**P* < 0.01.

(E) Collective data (*n* = 4) of the number of probing marks on the surface of TN1<sup>OA</sup> or TN1 made by BPHs treated with *NIGr23a* dsRNA or *GFP* dsRNA. *t*-test; ns, *P* > 0.05; \*\**P* < 0.01.

(F) The duration of each EPG waveform as a proportion of observation time produced by BPHs on TN1 or TN1<sup>OA</sup>. Stacked bar graphs represent means + SEM. *t*-test; ns, *P* > 0.05; \**P* < 0.05; \*\**P* < 0.01 (*n* = 5).

---

(G) The duration of each waveform as a proportion of observation time produced by *NlGr23a*-silenced and *GFP* dsRNA-treated BPHs on TN1 or TN1<sup>+OA</sup>. Bars represent means + SEM. *t*-test; ns,  $P > 0.05$ ;  $*P < 0.05$ .

#### ***NlGr23a* is also indispensable for sensing OA via BPH tarsi**

Given that *NlGr23a* was highly expressed in the tarsus (Figure 4A), we developed a novel experiment referred to a previous method (Lee *et al.*, 2010), tarsal avoidance response (TAR) assay, to explore whether *NlGr23a* functioned in OA detection via the tarsi (see Material and Method for the detail of TAR assay). We first determined the behavioral significance of OA to the tarsal behavior by presenting sucrose or sucrose plus OA as a stimulus to the legs. The tarsi preferably adhere to Kimwipe dipped in sucrose (Figure 4B and see also Figure 4—video supplement 1). However, the tarsi elicited TAR after adding OA into sucrose solution (Figure 4B and see also Figure 4—video supplement 2). A small increase was observed in TAR in the second exposure of sucrose alone, likely due to the residual OA effects. Moreover, we observed that OA solution triggered a TAR in a dose dependent manner (Figure 4C). This experiment clearly indicates that female BPH is equipped with a sensitive detection system for OA in the tarsi. As expected, ds*NlGr23a*-injected BPH exhibited a significant reduction in TAR compare to the control (Figure 4D), which supported the idea that *NlGr23a* is indispensable for sensing OA via BPH tarsi.

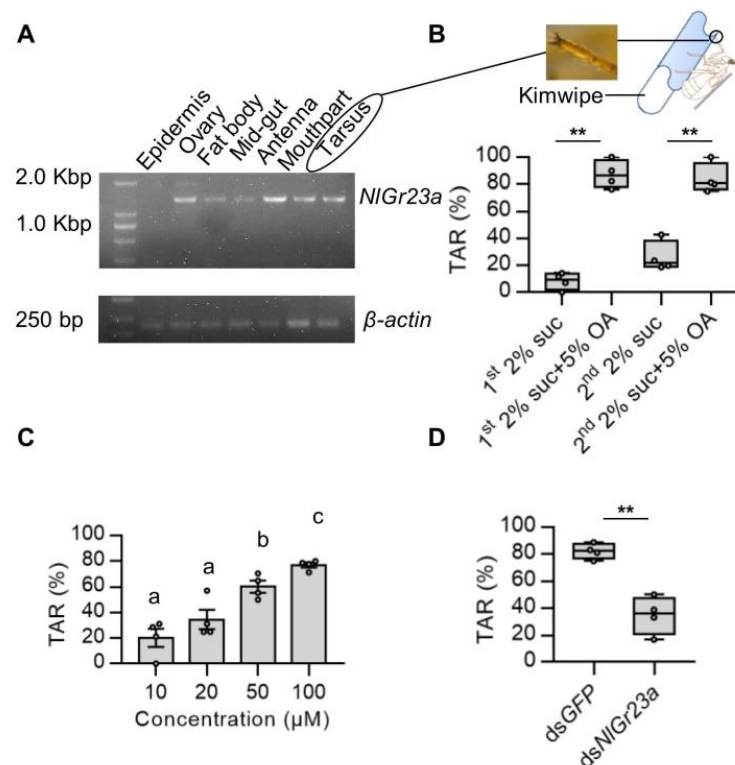

**Figure 4. *NlGr23a* is indispensable for sensing OA via BPH tarsi.**

(A) RT-PCR of *NlGr23a* on RNA isolated from various organs and tissues. All samples were isolated from one-day-old brachypterous female adults.

(B) Top: Schematic illustration of tarsal avoidance response (TAR) assay for BPHs. Bottom: Collective data ( $n = 4$ ) of TAR of BPHs in response to different stimulants. Insects were initially given 2% sucrose, then 2% sucrose in combination with 5% OA. The trial was conducted two rounds.  $t$ -test;  $**P < 0.01$ .

(C) TAR in BPH upon legs stimulation by 10, 20, 50, 100  $\mu$ M solutions of OA. Bars represent means  $\pm$  SEM. Different lowercase letters above columns represent significant differences at  $P < 0.05$  from Duncan's multiple range test ( $n = 4$ ).

(D) TAR values for *NlGr23a* dsRNA-treated and *GFP* dsRNA-treated BPHs in response to 100  $\mu$ M OA.  $t$ -test;  $**P < 0.01$  ( $n = 4$ ).

**Figure 4—video supplement 1. Tarsal avoidance response (TAR) to sucrose.** A Kimwipe containing 2% sucrose was applied to the distal part of legs of BPH. BPH showed acceptance towards the wet wick and its tarsi preferably adhere to Kimwipe.



**Figure 4—video supplement 2. Tarsal avoidance response (TAR) to oxalic acid.** A Kimwipe containing 2% sucrose plus 5% oxalic acid was applied to the distal part of legs of BPH (the same as the one in Figure 4—video supplement 1) at 5 min interval after 2% sucrose treatment. BPH refused to adhere to the wick and used leg to push away Kimwipe. The hindlegs of BPH did not contact Kimwipe.

## Discussion

Although insect bitter Grs are assumed to detect plant secondary compounds or bitter tastants (Robertson and Wanner, 2006), it is still very difficult to identify the ligands of bitter Grs, especially new examples. The pioneering identifications typically used electrophysiological and behavioural genetic analyses in Gr mutants of the model insect *D. melanogaster*. Additionally, nearly all of the ligands tested to date have been directly purchased compounds such as caffeine, strychnine, umbelliferone, saponin, chloroquine, and L-canavanine (Moon *et al.*, 2006; Poudel *et al.*, 2015; Shim *et al.*, 2015; Poudel *et al.*, 2017; Sang *et al.*, 2019). In other species, especially in agricultural insect pests, Gr ligands are often assumed to match those of the orthologous fruit fly receptors. As non-sugar Gr genes are subject to rapid adaptation driven by the vastly different ecological niches occupied by insect species and shared sequence identity among species is low, it is difficult to identify matching receptors. Alternatively, candidate ligands have been chosen from chemical classes that are known to elicit neurophysiological or behavioural responses. For example, a collection of known oviposition stimulants of *Papilionidae xuthus* were selected to test for interaction with PxutGr1, and eventually synephrine was identified as the specific ligand (Ozaki *et al.*, 2011).

In order to expand potential ligand sources for non-sugar Grs, plant extracts have been tested in few cases. Extracts of whole citrus caused an increase in Ca<sup>2+</sup>-dependent luminescence in Sf9 cells after the introduction of PxutGr1 (Ozaki *et al.*, 2011), and similar results were observed for crude extracts of cotton leaves and 3 Grs in *Helicoverpa armigera* (HarmGr35, HarmGr50, and HarmGr195) (Xu *et al.*,

2016). However, no specific ligand has so far been identified based on separation of these crude extracts. In this study, we started from rice crude extracts and eventually identified OA as a ligand of NIGr23a. To our knowledge, OA is the first identified ligand starting from plant crude extracts, and the first strong acidic ligand for insect Gr proteins.

Grs in insects are known to form heterodimers with co-receptors to recognize the tastant (Dahanukar *et al.*, 2007; Lee *et al.*, 2009). Nevertheless, there are several instances of the expression of a single insect Gr in a heterologous expression system sufficient to confer tastant responses, including Gr5a, Gr43a and Gr64e from *Drosophila*, BmGr8 and BmGr9 from the silkworm *Bombyx mori*, PxutGr1 from the swallowtail butterfly *Papilio xuthus*, HarmGR35, HarmGR50 and HarmGR195 from the polyphagous pest *Helicoverpa armigera*, AgGr25 from the malaria mosquito *Anopheles gambiae* (Chyb *et al.*, 2003; Freeman *et al.*, 2014; Sato *et al.*, 2011; Zhang *et al.*, 2011; Ozaki *et al.*, 2011; Xu *et al.*, 2016), and PrapGr28 from the cabbage butterfly *Pieris rapae* (Yang *et al.*, 2021). In this study, the HEK293T cells expressing NIGr23a caused responses to OA (Figure 1F). But we do not exclude a possibility that NIGr23a requires co-receptors for its fully functionality *in vivo*. Based on the analysis tuned to a 7TMPs characteristic of insect Grs and a homology search with known broadly required gustatory co-receptors, NIGr2, NIGr11, NIGr13, NIGr15, NIGr17, NIGr18, NIGr21 and NIGr26 were selected for food preference assay with 1 mM OA (Kang *et al.*, 2018). Gene silencing of the target genes was achieved by dsRNA injection (See Appendix 3—figure 1A for the silencing efficiency of target genes and Appendix 2—table 1 for primers used for dsRNA synthesis and RNAi efficiency detection). Those BPHs treated with dsNIGr2 and dsNIGr13 were less sensitive to OA than controls (Appendix 3—figure 1B). These results suggest that NIGr2 and NIGr13 might act as co-receptors of NIGr23a for OA recognition or through NIGr23a-independent mechanisms.

### Appendix 3

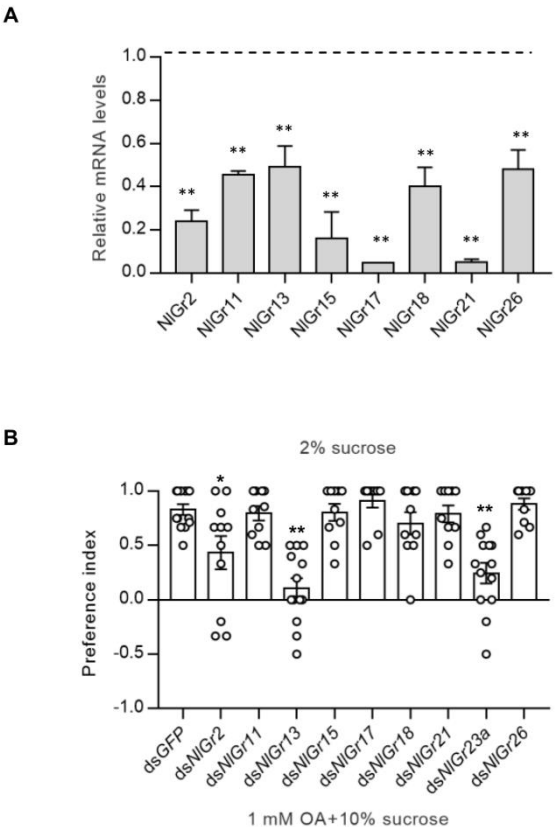

**Appendix 3—figure 1. Screen of potential co-receptors of NIGr23a using food choice assays.**

(A) The mRNA levels of target genes at 48 h post injection of dsRNA. All mRNA levels were normalized relative to the  $\beta$ -actin mRNA levels. The mRNA level of *GFP* was set to 1. Bars represent means + SEM. *t*-test; \*\**P* < 0.01 (n = 3).

(B) Unbiased screen of 8 potential co-receptors of NIGr23a in binary food choice assays. The data represent means ± SEM. (n ≥ 10). *t*-test; \**P* < 0.05; \*\**P* < 0.01

OA is, however, commonly present in rice plants. The species of only 11 out of 93 orders of higher plants do not store OA (Zindler-Frank, 1976). The fact that a secondary compound is deterrent to an insect does not imply that the insect does not eat plants containing that compound. Whether or not it does so depends on its sensitivity to the compound, the background of other deterrent and phagostimulatory information in which it is perceived, and the degree of food deprivation incurred by the insect (Chapman, 2003). In the EPG experiments of this study, OA concentrations

in artificial diets and in rice plants significantly inhibiting feeding phases were 1 mM and about 10 mM (the OA content of the background material TN1 was measured as above 5 mM), respectively (Fig.2C, Fig. 3A and F). The difference in active OA concentration may be due to the different background of other chemicals. Moreover, OA concentrations in rice plants are dynamic, maybe varied in tissues, and affected by rhythm, rice variety and developmental stages, as well as abiotic factors (Wu *et al.*, 2016). OA isolated from leaf sheath extracts of rice seems to mediate the phloem-feeding habit as a general inhibitor which commonly occurs in plant tissues outside the phloem (Yoshihara *et al.*, 1980). We also measured OA contents in three rice varieties and indeed found there is a significant difference in OA content between the susceptible TN1 rice and the resistant rice varieties IR36 and IR56 (Appendix 4—figure 1). Thus, we speculate that a population of sensory neurons tuned to OA is probably involved in detection of the dynamic changes of soluble OA to provide clues for the suitable habitats or feeding times.

#### Appendix 4

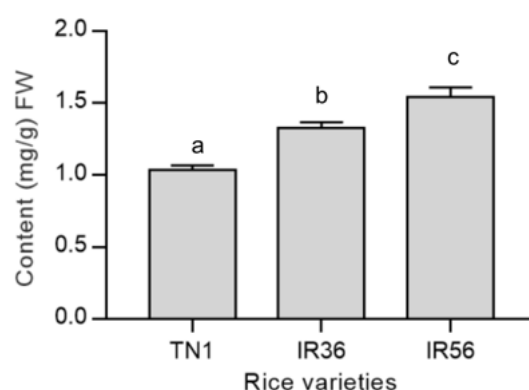

**Appendix 4—figure 1. OA content in different rice varieties.** OA content in different rice varieties analysed by HPLC. Bars represent means + SEM. Different lowercase letters above columns represent significant differences at  $P < 0.05$  from Duncan's multiple range test ( $n=4$ ).

Insects discriminate a wide range of tastants, including sugars, bitter compounds, NaCl, and sour substances. In contrast to sweet and bitter-tasting chemicals, acids

elicit varied behavioural responses, depending on their structure and concentration (Rimal *et al.*, 2019). In *Drosophila*, both Ir25a and Gr64a-f expressed in sweet taste neurons mediated appetitive responses to lactic acid (Stanley *et al.*, 2021). Knock-down of *Ir25a*, *Ir76b* and *Ir56d* abolished fatty acid recognition (Ahn *et al.*, 2017). By screening individual Gr64 cluster gene mutant flies, Gr64e was also identified as a receptor mediating fatty acid sensing (Kim *et al.*, 2018). Ir7a expressed in bitter GRNs is required for rejecting foods laced with high concentrations of acetic acid (Rimal *et al.*, 2019). So far, most chemoreceptors respond to sour tastes are ionotropic receptors, such as Ir25a and Ir76b (Chen and Dahanukar, 2020). In this study, we investigated an important plant-insect interaction and found that NlGr23a in BPH senses OA in rice.

It was reported that behavioural repulsion from acidic stimuli is mediated by two different classes of GRN in the fruit fly: those sensing sugar and bitters (Charlu *et al.*, 2013; Devineni *et al.*, 2019). This implies that Grs sensing sour compounds may influence insect behaviour through multiple pathways. After *NlGr23a* was silenced, BPHs with *NlGr23a* dsRNA were used for transcriptome and KEGG pathway analysis of the differentially expressed genes. These analyses showed that NlGr23a may function through diverse signalling pathways, including mTOR, AMPK, insulin, and PI3K-AKT (see Appendix 5—figure 1). The possible molecular mechanisms of NlGr23a in modulating feeding behaviour will be further investigated.

## Appendix 5

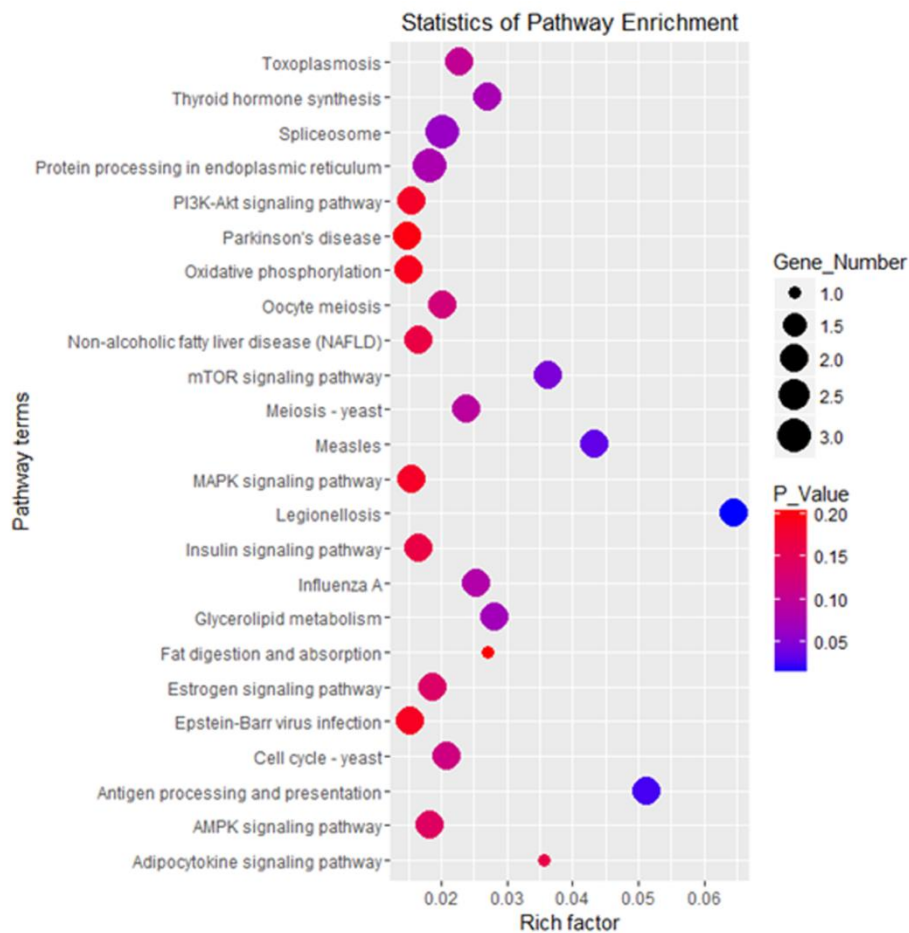

**Appendix 5—figure 1. Statistical analysis of enriched pathways for genes differentially expressed between *NlGr23a* dsRNA and *GFP* dsRNA-treated BPHs.**

## Materials and Methods

### Insect and rice culture

A BPH laboratory strain (*Ctl*) was obtained from Guangdong Academy of Agricultural Sciences (GDAAS, Guangdong, China), and this strain was reared in a continuous laboratory culture on susceptible rice seedlings (variety Huang Hua Zhan). All BPHs were maintained at  $26 \pm 2$  °C with  $80 \pm 10\%$  humidity and a light-dark cycle of L16:D8 h. One-day-old brachypterous female adults were collected for the following bioassays. Plants aged 30–40 days of the susceptible rice variety TN1 were used for the relevant bioassays. Allocation of insects was randomly done to minimize the effects of subjective bias.

## Chemical sources

OA, glycerine, adonitol, methoxylamine hydrochloride, *N*-methyl-*N*-(trimethylsilyl) trifluoroacetamide, tetrabutylammonium bisulphate (TBA), KH<sub>2</sub>PO<sub>4</sub> and strychnine and caffeine (purity, ≥99%) were purchased from Sigma-Aldrich Company (St. Louis, MO, USA). HPLC grade reagents including petroleum ether (PE), chloroform (CH<sub>3</sub>Cl), ethyl acetate (EAC), methyl alcohol (MeOH), acetonitrile (ACN), isopropyl alcohol and pyridine, and analytical grade reagents including sucrose, trans-aconitic acid, benzoic acid, salicylic acid, mandelic acid, quinine and ethyl alcohol were all obtained from Aladdin Reagent (Shanghai, China). Maleic acid was purchased from MedChemExpress (Shanghai, China). Hydrochloric acid (HCl) was provided by the Guangzhou Chemical Reagent (Guangzhou, China).

## Ligand determination for NIGr23a

### *NIGr23a* cDNA cloning and stable cell line construction

Total RNA from BPHs was prepared as previously described (Kang *et al.*, 2018). A PrimeScript<sup>TM</sup> RT reagent kit with gDNA Eraser (Takara, Kyoto, Japan) was used with 1 µg RNA for first-strand complementary DNA (cDNA) synthesis. A fragment of full-length *NIGr23a* cDNA was amplified using 2×SuperStar PCR Mix with Loading Dye (Genstar, Beijing, China) following the manufacturer's instructions. The cloning primers are listed in Appendix 2—table 1.

The *NIGr23a* cDNA was inserted into the Hind III and EcoR I sites of pIZ/V5-His vectors (Invitrogen, Carlsbad, CA, USA) using T4 DNA ligase (NEB, Beijing, China). The NIGr23a-Sf9 stable cell lines were obtained by using a previously described method (Chen *et al.*, 2021). Briefly, Sf9 cells were cultured in Grace's Insect Medium (Gibco, Grand Island, NY, USA) supplemented with 10% foetal bovine serum at 27 °C. Cells were plated into 6-well plates and left to settle for 20 min before being transfected with either 2 µg of the recombinant plasmid pIZ-NIGr23a-V5-His or pIZ-V5-His vector (negative control), and 6 µL Fugene HD transfection reagent (Promega, Madison, WI, USA) in 100 µL per well of Grace's Insect Medium.



Forty-eight hours after transfection, cells were cultivated under Zeocin selection. The final concentration of Zeocin to maintain cells was 100 µg/mL. Following antibiotic selection for at least 10 passages, stable cell lines were verified by immunoblotting and RT-PCR. For western blotting analysis, cells were lysed by total membrane proteins extraction buffer A (Invent Biotechnologies, Inc., Eden Prairie, USA). The supernatant of the mixture was further centrifuged. The sediment contains the total membrane proteins while the supernatant contains cytosol proteins. Samples were then immunoblotted with anti-V5 antibody. For RT-qPCR, we extracted total RNA of cells after antibiotic selection for cDNA template synthesis. PCR was performed under the following conditions: 94°C for 2 min, 35 cycles of 94°C for 30 s, 55 °C for 30 s, 72°C for 90 s, and 72°C for 5 min. PCR amplification products were run on a 1.2% agarose gel.

The HEK293T cells were cultured in Dulbecco's modified Eagle medium (Gibco, California, USA) supplemented with 10% fetal bovine serum in an atmosphere of 5% CO<sub>2</sub> and 95% relative humidity at 37 °C. To confirm the sufficiency of NIGr23a for OA-mediated response, the HEK293T cells were transiently transfected with NIGr23a/pcDNA3.1-FLAG. NIGr23a/pcDNA3.1-FLAG was constructed by inserting a C-terminally FLAG-tagged human codon-optimized *NIGr23a* ORF into the pcDNA3.1 vector using BamHI and EcoRI sites. The nucleotide sequences of the codon-optimized genes were listed in Appendix 6—figure 1. Each 0.5 µg plasmid was transfected into the HEK293T cells using Lipofectamine 3000 (Invitrogen, Carlsbad, CA, USA), according to the manufacturer's instruction.

## Appendix 6

```

1 ATGCTGAAGAACAGCGCCTGCAAAGTAACAAGAGAGGTATCGGGAGACTGCTGGATATG
1 M L K N K R L Q S N K R G I G R L L D M
61 AGAAACAACAAGCCGCCACCAACGCGTCACCTCCCTGCCTCACATTATACATGTGCTG
21 R N N K A A T K R V T S L P H I I H V L
121 GATGTTAACTATAAGACAGCCTATGATTATCATGAGAAGCTGAGGCACTGTATCTACTTC
41 D V N Y K T A Y D Y H E K L R H C I Y F
181 GAACCTATTCAAATAGTCTCTCTGCTCTGGAGCCTGCTGGGCAGACTGCCAATCAGACGC
61 E P I Q I V L F V W S L L G R L P I R R
241 GACTCTACTGGAGACTATATTGTGCCATTGTCTCAGAGTGTACAGTTTCTCTGTTGGA
81 D S T G D Y I V P I V L R V Y S F L V G
301 AGTATCATTGTGGTGATTGGCTCAATCAGCCTGAGGAACCTCGTCAAGTCCCTCCTGAAC
101 S I I V V I G S I S L R N L V K S L L N
361 GCGGAGAGCGGTGTACGAAGAGCCACATCTGTGATTGGAGACTACAACATACATCTTT
121 G E S V Y E E P T S V I G D Y N Y T L F
421 TGGATCTGTGAGATCCTCGTGACCACTTATAACATTTCCCTGCCCTTCTGGAGTGGACT
141 W I C Q I L V T T Y N I S L P F L D W T
481 ATCGTGGGCGAGTTCTCAAGTTTCTCCGAGCTGGGCTCAGTTCCAGGAGAACTATACC
161 I V G E F L K F L R S W A Q F Q E N Y T
541 CTGGAGAGCCGGAAGTGCTGAGCATCAAGAGCAAGAACAAGATACGCATCATCTTCTAT
181 L E S R K V L S I K S K N R I R I I F Y
601 ATGACTCTGCTGGTGAACATGACCACCGTCGCCCTACCTGAACAATTTCTGATGAAGAAC
201 M T L L V N M T T V A Y L N N F V M K N
661 GTGGATGTGTTTACCAAGATCAGTACCCCTCACTGCAGTCTGGAACCTCGAATCCGCACT
221 V D V F T K I S T L T A V V E L E S R T
721 GCTTTCTTCTGGCATACTGTGCTGTATCAGCGATTGCAGCGAACAACCTGTCTATCACC
241 A F F W H T C A V I S D C S E Q L S I T
781 TTTTGCAAGAAAACCTGGAGTCCAGAGTGAGCAGAGGCGCACAGACACTCGGAGATTAC
261 F C K K T L E S R V S R G A Q T L G D Y
841 AGGCGCCTCTGGCTGCAGCTGACCGACATTACTAGTTTTCAGCGATCTCATGAGCTAC
281 R R L W L Q L T D I T T S F S D L M S Y
901 AAGATGACCCATTCAATCTTTGTTAATGTGATTTTCGTTATAGTGACTAGTTATCATCTG
301 K M T H S I F V N V I F V I V T S Y H L
961 GCCCTGTGAGCACTGAGCCGCGGAGTTTCGCGGCGAGTCTGGAGACATATACCTCTACTTC
321 A L S A L S R G V R G S A G D I Y L Y F
1021 TTTCTGTTCCCTCTACACAGCAGCCACGTGATGCTGGCTGTGAATCCGGCCACAGACTC
341 F C S L Y T A A H V M L A C E S G H R L
1081 GCTCAGAGTCTCGGGAAGAAATTTGTTGATCGGGCCACCAGGCGGAGACTCCAACACCTG
361 A Q S L G K K F V D R A T R R R L Q H L
1141 TCATTGCGAGAGCGGAAGAGTTTCTGTGTTTATGGGCATCGTGCCGAGGAGGTCACT
381 S F A E R K E F S V F M G I V R R R S P
1201 TCAGTCATCTCAATGGTTTCTCACCGTCGATCGCAGTCTGATCGTGTCTTTGTGAGT
401 S V I L N G F L T V D R S L I V L F V S
1261 GGTGTCACATACCTGATCATTCTCGTGCAATTCAAAGTGGGCATGAGCGAAACTCAT
421 G C L T Y L I I L V Q F K V G M S E T H
1321 AGAGTGCAAGATAGCAATATCTCACTCAGCAGG
441 R V Q N S N I S L S R

```

## Appendix 6—figure 1. The nucleotide sequences of human codon-optimized *NIGr23a* genes.

### Isolation and identification of active compounds in rice

A bioassay-guided approach was adopted to isolate and identify active compounds interacting with *NIGr23a* from the crude extracts of rice plants. Firstly, we ground stems and leaves of TN1 (5 g), and performed serial solvent extractions on macerated subsamples with 25 mL of isopropanol (IPA) at 75 °C for 15 min, 25 mL  $\text{CHCl}_3$ –IPA (1:2, v/v; 5 h; room temperature), and 25 mL  $\text{MeOH}$ – $\text{CHCl}_3$  (2:1, v/v; overnight; room temperature). Each extract was centrifuged at 2,000 rpm for 15 min to collect the supernatant. The pooled supernatants were then concentrated to dryness in vacuum at 25 °C and re-dissolved in 12 mL  $\text{CHCl}_3$  to obtain the crude rice extract.

Secondly, 6 mL crude extract was subjected to a column chromatography with silica gel, eluting with solvents in the order of increasing polarity (PE - CHCl<sub>3</sub> - EAC - MeOH) to yield four fractions. We carried out the first round of ligand screening using these four initial fractions. Thirdly, semi-preparative HPLC separation of the bioassay-active fraction I was performed on an Agilent 1260 HPLC system (Agilent Technologies, Santa Clara, CA, USA) equipped with an Agilent ZRBAX SB-C18 column (4.6 mm × 150 mm, 3.5 μm) by gradient elution with ACN (A) and water (B). The gradient program was as follows: 3 min, 5% B; 22 min, 5–20% B; 15 min, 20–40% B; 15 min, 40–50% B; 8 min, 50–95% B; 12 min, 95–5% B, all at a flow-rate of 1 mL/min. The eluate from the column was continuously monitored at 205 and 290 nm after sample loading (5 μL), and the fraction collector was programmed to collect fractions during periods in which most substances were detected (see Appendix 1—figure 2A). The second round of screening for the ligand was then carried out with these subfractions. Fourthly, the active semi-prep-HPLC fraction (active fraction II) was subjected to further fractionation with 100% ACN at a flow-rate of 1 mL/min for the third round of screening. Last, the bioassay-positive fraction from this latest round (active fraction III) was derivatized and elucidated using GC-MS. The GC-MS detection for the derived samples was performed on an Agilent 7890A gas chromatograph equipped with an Agilent 5975C VL MSD detector (Agilent Technologies, Santa Clara, CA, USA) as previously described (Kang *et al.*, 2019).

### **Calcium imaging assay**

Calcium imaging using fura-2/AM calcium indicator dye was performed as previously described with some modification (Nelson *et al.*, 2001; Chen *et al.*, 2021). Cells were seeded in a glass bottom cell culture dish (φ20 mm, Nest, Jiangsu, China) at 70% confluency and grown overnight. After being washed in Hanks' balanced salt solution (HBSS, Solarbio, Beijing, China) for three times, cells were incubated for 30 min with 2 mL HBSS, which was added with 2 μL 1 mg/mL fura-2/AM (Invitrogen, Carlsbad, CA, USA, dissolved in DMSO,) under shaking conditions (60 rpm) at room temperature in dark. Subsequently, fura-2/AM solution was removed and cells were then washed twice with HBSS and were covered with 2 mL of fresh HBSS. Imaging

experiments were conducted on a Leica live cell imaging microscope (DMI6000B) equipped with a CCD camera. Cells were stimulated with 340 and 380 nm UV light. A 200  $\mu$ L test solution was added into the dish using pipette. Data acquisition and analysis were performed by using Leica LAS-AF software (version 2.6.0). The  $F_{340}/F_{380}$  ratio was analyzed to measure  $Ca^{2+}$ . Cell assays were repeated for at least three times. Sample size of cell assays to achieve adequate power was chosen on the basis of a previous report with similar methods (Sato *et al.*, 2011).

### **Microscale thermophoresis**

In this study, the Microscale Thermophoresis device (Nano Temper Technologies) was used for measurements of binding affinities. Briefly, the recombinant plasmid pIZ-NIGr23a-GFP was constructed using the *NIGr23a* ORF with Kozak consensus sequence at the 5' ends and *GFP* coding sequence at the 3' ends cloned into pIZ-V5-His vector. Subsequently, Sf9 cells were transfected with the pIZ-NIGr23a-GFP plasmid (2  $\mu$ g per  $10^6$  cells) using Lipo3000. To achieve higher transfection efficiency, a second transfection was performed in the same batch of Sf9 cells at 24 h after the first transfection. Cells were harvested 48 h after the second transfection. After one wash in PBS, cells were lysed in RIPA lysis buffer and then incubated on a rotary table. After samples were rotated for 1.5 h, the lysates were centrifuged at 13,000 xg for 15 min at 4  $^{\circ}$ C. The extract was harvested and separated into 5  $\mu$ L per portion; each portion of cell lysate was mixed gently with equal volume of 2 fold gradient diluted OA or glycerol respectively and used for microscale thermophoresis under procedures described previously (Wienken *et al.*, 2010).

### **RNAi treatments**

#### **dsRNA preparation and injection into BPH**

Template DNA for dsRNA synthesis was amplified using gene-specific primers (see Appendix 2—table 1). The resulting purified products were then used to synthesize dsRNA using a MEGAscript T7 High Yield Transcription Kit (Promega, Madison, WI, USA). The concentration of *NIGr23a* dsRNA (239 bp) was quantified with a NanoDrop 2000 instrument (Thermo Fisher Scientific, Waltham, MA, USA).

Finally, the quality and size of the dsRNA were further verified via electrophoresis in a 1% agarose gel. *GFP* dsRNA was used as a control. BPHs were collected from the culture chamber and anaesthetized with CO<sub>2</sub> for 20 s. Approximately 250 ng dsRNA was injected into each individual. After injection, the BPHs were reared on fresh rice plants, which were maintained in transparent polycarbonate jars measuring 15 cm in diameter and 70 cm in height. Individuals exhibiting motor dysfunction and/or paralysis in 12 h were excluded for next steps. Total RNA of whole body was extracted from five randomly selected individuals to examine the gene silencing efficiency at different time-points (24 h, 48 h and 72 h) by quantitative reverse transcription PCR (qRT-PCR). Total RNA of antennae, mouthparts and legs separately dissected from 30 females 48 h after ds*NlGr23a* injection was subjected to examine the gene silencing efficiency in primary gustatory organs. Feeding bioassays were conducted 48 h after injection.

## qRT-PCR analysis

The qRT-PCR procedure was performed using a Light Cycler 480 (Roche Diagnostics, Basel, Switzerland) with a SYBR®FAST Universal qPCR Kit (KAPA, Woburn, MA, USA), following the manufacturer's instructions. Each reaction mixture included 1 µL of cDNA template equivalent to 1 ng of total RNA, 0.3 µL of each primer (10 µM), and 5 µL SYBR mix in a total volume of 10 µL. Reactions were performed in triplicate for each sample; three biological replicates and three reactions for each biological replicate were performed. Gene expression levels were normalized to the expression level of BPH *β-actin* (Chen *et al.*, 2013). The specific primers used for qRT-PCR are listed in Appendix 2—table 1. The amplification conditions were as follows: 95 °C for 5 min, followed by 45 cycles of 95 °C for 10 s, 60 °C for 20 s and 72 °C for 20 s.

## Behavioral experiments

### Feeding bioassays of BPHs on artificial diet

The no-choice test apparatus for evaluation of feeding decision behaviour was a BPH rearing chamber and artificial diet D-97 (Figure 2A, top) (Fu *et al.*, 2001). Two layers



of stretched parafilm were filled with artificial diet (40  $\mu$ L), either with OA (100  $\mu$ M, +OA) or without (-OA). BPHs ( $n = 6-10$ ) were placed onto the food-containing parafilm at the beginning of the experiment in each of three replicates. We counted the insects remaining on each parafilm ( $N_{on}$ ) at 30-min intervals for 4 h. The proportion of BPHs accepting food sources was calculated as (food acceptance =  $N_{on}/N_{total}$ ), where  $N_{total}$  represents the total number of test insects. In two-choice tests, parafilms containing 40  $\mu$ L of either +OA or -OA artificial diet were located at opposite open ends of the chamber. Ten BPHs per replicate were introduced into the middle of the cylinder at the beginning of the experiment; three replicates were performed (Figure 2B, top). Insects were starved for 6 h before each experiment. We scored the distribution of insects on each side at 30-min intervals for 4 h. Values were totalled and a position index (PI) for the 4 h period was calculated as  $PI = (BPHs \text{ on the food with OA} - BPHs \text{ on the food without OA}) / (BPHs \text{ on the food with OA} + BPHs \text{ on the food without OA})$ . The PI values range from -1 to 1, with PI = 0 indicating no position preference for either control or treatment artificial diets, PI > 0 indicating preference for treatment diets, and PI < 0 indicating preference for control diets. The set-up was placed in a walk-in chamber at  $26 \pm 2$  °C at a relative humidity level of 80%  $\pm$  10%.

To directly measure feeding, we performed food choice assays as described previously (Sang *et al.*, 2019; Lee *et al.*, 2010). Briefly, 10 BPHs (1-day-old brachypterous female adults) were starved for 6 h and introduced into a glass cylindrical column in each replicate ( $8 \leq n \leq 10$ ). Then, we prepared two mixtures with each non-toxic dye enclosed in parafilms and located the mixtures at opposite ends of a glass cylindrical column to monitor their food preference. One mixture contained the indicated concentration of OA and 10% (w/v) sucrose with blue dye (Brilliant Blue FCF, 0.2 mg/ml), and the other mixture contained 2% sucrose with red dye (sulforhodamine B, 0.1 mg/ml). BPHs were given 4 h to choose between these two choices. After feeding, BPHs were sacrificed by freezing at -20 °C, and then, we dissected them to observe their mid-gut colors under the microscope for the presence of red ( $N_R$ ), blue ( $N_B$ ), or purple ( $N_P$ ) dye. The preference index was calculated using

the following equation: preference index =  $(N_R - N_B)/(N_R + N_B + N_P)$ , depending on the dye/tastant combinations. Preference index of -1.0 or 1.0 indicated a complete preference to either 10% sucrose with OA or 2% sucrose alone, respectively. A preference index of 0.0 indicated no bias between the two food alternatives. Each treatment had four biological repeats.

### **Ingestion assay**

To assess whether much lower concentration of OA inhibited BPH feeding, the ingestion assay was carried out following a modified protocol (Sang *et al.*, 2019). After 6 h starvation, 1-day-old female BPHs were allowed to feed on 1% (w/v) Brilliant Blue FCF food with or without 100  $\mu$ M OA for 4 h. BPHs were sacrificed by freezing at -20  $^{\circ}$ C after feeding. Six females were transferred into 1.5 ml centrifuge tubes filled with 200  $\mu$ l PBST (1 $\times$  PBS with 0.2% Triton X-100) and were completely ground. Then 800  $\mu$ l of PBST was added and blended. Sample was centrifuged for 5 min at 15,871 g at 4  $^{\circ}$ C. Subsequently, the absorbance of supernatant was measured at 630 nm using a NanoDrop 2000 instrument. PBST alone was used as the blank control. The experiment was repeated with 4 biological replicates.

### **Surgeries**

Females were anesthetized with CO<sub>2</sub>, and the second and third antennal segments were removed with a set of sharp forceps.

### **Feeding bioassays of BPHs on rice**

Rice with a higher content of OA (TN1<sup>+OA</sup>) was obtained by the immersion method. Briefly, TN1 rice at the tillering stage was immersed in OA solution (20 mM) for 5 min and air-dried for 1 h. The resulting OA level was determined as follows. Firstly, the rice was washed and drained, then ground to a powder using liquid nitrogen. Secondly, the rice powder was placed in a 50 mL centrifuge tube and mixed with 0.5 mol/L HCl (fresh weight of rice : HCl = 1:5; m:m). The homogenate was placed in a boiling water bath for 15–20 min then centrifuged at maximum speed. The resulting supernatant was diluted 10 times with ddH<sub>2</sub>O. Finally, the sample was filtered with a microporous filter membrane (0.45  $\mu$ m). The OA content was determined using an UltiMate 3000 HPLC (Dionex Corporation, Sunnyvale, CA, USA) equipped with an



Agilent ZRBAX SB-C18 column (4.6 mm × 150 mm, 3.5 μm). The mobile phase was 5 mM TBA in 0.5% KH<sub>2</sub>PO<sub>4</sub> (pH 2.0) with a flow rate of 1 mL/min. The eluate from the column was continuously monitored at 220 nm after sample loading (5 μL).

To evaluate BPH food preferences across rice diets with different OA levels, we performed dual choice assays as described above with the following modifications. At the beginning of each experiment, ten BPHs were placed on the middle of a sponge, which sealed an upside-down plastic cup containing one TN1 stem and one TN1<sup>+OA</sup> stem. Probing marks were detected based on a previously described method (Sogawa and Pathak, 1970). In each of four replicates, BPHs (n = 4) reared on one rice stem were confined for 4 h using a 50 mL polypropylene tube. The exposed plant parts were stained with 1% eosin Y (Aladdin Reagent, Shanghai, China), then probing marks on the plant surface were counted.

# **Tarsal avoidance response (TAR) assay**

TAR assay referenced proboscis extension response (PER) assay (Lee *et al.*, 2010). After BPH adults were anaesthetized with CO<sub>2</sub>, the back of each adult was immobilized on a Petri dish using a double-stick tape, while all legs were remained free. BPHs were allowed to fully recover in a humidified incubator for 10-15 min. Before TAR testing, water was given to BPHs to exclude insects in a fright or unhealthy state, if they showed avoidance to water. Then, tastants were delivered to the distal parts of legs without contacting the mouthpart and the antennae using a small piece of Kimwipe paper wicks. TAR response of each individual was observed within 3 s after tastant treatment. The response, the hindlegs avoiding the contact of Kimwipe, was counted as TAR. BPHs often adhere on wet wicks treated with water or stimulant only and used leg to push away Kimwipe treated with deterrent tastants. Insects were tested in a group of 15–20 individuals, and the percent of insects showing TAR to each tastant was observed and recorded.

To determine the behavioral significance of OA to the tarsal behavior, we contacted the legs of each PBH with 2% sucrose (1<sup>st</sup> exposure), 2% sucrose plus 5% OA (1<sup>st</sup> exposure), 2% sucrose (2<sup>nd</sup> exposure), and 2% sucrose plus 5% OA (2<sup>nd</sup> exposure), sequentially. TAR response of each individual was observed within 3 s after tastant

treatment. Trials were separated by a 10 min inter trial interval so as to remove any gustatory clues which could have been left behind during previous trials. To determine the deterrent effect of OA, BPHs were treated with different concentrations of OA (10, 20, 50, 100  $\mu$ M). To test the effect *NlGr23a* on OA detection via the tarsus, ds*NlGr23a*-injected BPHs were applied with 100  $\mu$ M OA. *GFP* dsRNA was used as a control. Each treatment or control had four biological repeats.

### **Electrical penetration graph (EPG) recording of BPH feeding behaviour**

BPH feeding behaviour was recorded on a Giga-8 DC EPG amplifier (GDAAS, Guangdong, China) based on a previously described method (Zhang *et al.*, 2015). Briefly, all experiments were carried out at 26  $^{\circ}$ C  $\pm$  1  $^{\circ}$ C and 70%  $\pm$  10% relative humidity under continuous light conditions. The feeding behaviour of individual BPHs on liquid-diet sacs or rice was monitored for at least 3 h. The rice variety or liquid-diet sacs were used alternately, and new insects were used for each recording. Each treatment was replicated 5 times. The signals recorded were analysed using PROBE 3.4 software (Wageningen Agricultural University, Wageningen, The Netherlands). Each feeding behaviour was expressed as the duration of each waveform as a proportion of total monitoring time (%) and the number of times each waveform occurred.

### **Tissue-specificity of *NlGr23a***

Antenna, mouthpart, tarsus, mid-gut, fat body, ovary and epidermis were separately dissected from 20 to 30 one-day old female adults, depending on the size of the organs and tissues. All collected samples were stored immediately in lysis buffer offered by RNA extraction kit and ground with steel beads in a cryogenic grinder. Total RNA was extracted using a Micro Elute Total RNA kit (Omega Bio-tek, Norcross, GA, USA) following the manufacturer's protocols. RNA quantity was determined as previously described. Using 100 ng of total RNA, cDNA was synthesized as before for a RT-PCR template. Full length gene-specific primers of *NlGr23a* were used for RT-PCR analysis listed in Appendix 2—table 1. BPH  $\beta$ -actin gene was used as control. PCR was performed under the following conditions: 94  $^{\circ}$ C

for 2 min, 39 cycles of 94°C for 30 s, 55 °C for 30 s, 72°C for 90 s, and 72°C for 5 min. The number of cycles was reduced to 29 for *β-actin*. PCR amplification products were run on a 1.2% agarose gel.

## Statistics

All statistical analyses were performed using IBM SPSS Statistics 24 (IBM, Armonk, NY, USA). The differences between two groups were analysed using two-tailed *t*-test. Differences among multiple groups were analysed using one-way ANOVA followed by Duncan's multiple range test for multiple comparisons.  $P < 0.05$  was marked “\*” and  $P < 0.01$  was marked “\*\*”. Data were checked for normal distribution using Shapiro-Wilk test.

## Acknowledgements

We would like to thank Mr. Yang Zhang (Guangdong Academy of Agricultural Sciences, Guangdong, China) for providing us with *N. lugens* strains and his help in using EPG amplifier. This work was supported by the National Natural Science Foundation of China (U1401212, 31672021) and the Young Teacher Foundation of Sun Yat-sen University (19lgpy205).

## Contributions

WZ designed and supervised the entire study. KK carried out ligand identification experiments and feeding bioassays of BPHs on artificial diet. MZ carried out feeding bioassays of BPHs on rice and TAR assays. LY performed the GC-MS and identified compounds. WC helped in developing the calcium-imaging assay method. YD and SX conducted the HPLC separation of the bioassay-active fractions. K. Lin performed and analysed EPG recordings. K. Liu and JL carried out the quantitative RT-PCR. ZG carried out microscale thermophoresis assay. KK and MZ analysed the data. WQ, MZ and KK wrote the manuscript. All authors read and commented on the manuscript.

## Competing Interests

The authors declare no competing interests.

## References

1. Ahn JE, Chen Y, Amrein H. Molecular basis of fatty acid taste in *Drosophila*. *Elife*. 2017; 6: e30115. doi: 10.7554/eLife.30115.
2. Aljunid SF, Anderson M. Ultrastructure of sensilla on the antennal pedicel of the brown planthopper *Nilaparvata lugens* Stal (Insecta: Homoptera). *Cell and Tissue Research*. 1983; 228: 313-322. doi: 10.1007/BF00204881.
3. Chapman RF. Contact chemoreception in feeding by phytophagous insects. *Annual Review of Entomology*. 2003; 48: 455-484. doi: 10.1146/annurev.ento.48.091801.112629.
4. Charlu S, Wisotsky Z, Medina A, Dahanukar A. Acid sensing by sweet and bitter taste neurons in *Drosophila melanogaster*. *Nature Communications*. 2013; 4: 2042. doi: 10.1038/ncomms3042.
5. Chen J, Liang Z, Liang Y, Pang R, Zhang W. Conserved microRNAs miR-8-5p and miR-2a-3p modulate chitin biosynthesis in response to 20-hydroxyecdysone signaling in the brown planthopper, *Nilaparvata lugens*. *Insect Biochemistry and Molecular Biology*. 2013; 43: 839-848. doi: 10.1016/j.ibmb.2013.06.002.
6. Chen YD, Dahanukar A. Recent advances in the genetic basis of taste detection in *Drosophila*. *Cellular and Molecular Life Sciences*. 2020; 77: 1087-1101. doi: 10.1007/s00018-019-03320-0.
7. Chen W, Kang K, Lv J, Yue L, Zhang W. Galactose-*NI*Gr11 inhibits AMPK phosphorylation by activating the PI3K-AKT-PKF-ATP signaling cascade via insulin receptor and G $\beta\gamma$ . *Insect Science*. 2021; 28: 735-745. doi: 10.1111/1744-7917.12795.
8. Chyb S, Dahanukar A, Wickens A, Carlson JR. *Drosophila Gr5a* encodes a taste receptor tuned to trehalose. *Proceedings of the National Academy of Sciences of the United States of America*. 2003; 100: 14526-14530. doi: 10.1073/pnas.2135339100.
9. Cook SM, Khan ZR, Pickett JA. The use of push-pull strategies in integrated pest management. *Annual Review of Entomology*. 2007; 52: 375-400. doi: 10.1146/annurev.ento.52.110405.091407.
10. Dahanukar A, Lei YT, Kwon JY, Carlson JR. Two *Gr* genes underlie sugar reception in *Drosophila*. *Neuron*. 2007; 56: 503-516. doi: 10.1016/j.neuron.2007.10.024.
11. Devineni AV, Sun B, Zhukovskaya A, Axel R. Acetic acid activates distinct taste pathways in *Drosophila* to elicit opposing, state-dependent feeding responses. *eLife*. 2019; 8: e47677. doi: 10.7554/eLife.47677.
12. Douglas AE. Strategies for enhanced crop resistance to insect pests. *Annual Review of Plant Biology*. 2017; 69: 3.1-3.24. doi: 10.1146/annurev-arplant-042817-040248.

- 920 13. Foster S, Goodman LJ, Duckett JG. Ultrastructure of sensory receptors on the  
921 labium of the rice brown planthopper. *Cell and Tissue Research*. 1983a; 230:  
922 353-366. doi: 10.1007/BF00213809.
- 923 14. Foster S, Goodman LJ, Duckett JG. Sensory receptors associated with the stylets  
924 and cibarium of the rice brown planthopper, *Nilaparvata lugens*. *Cell and Tissue*  
925 *Research*. 1983b; 232: 111-119. doi: 10.1007/BF00222377.
- 926 15. Freeman EG, Wisotsky Z, Dahanukar A. Detection of sweet tastants by a  
927 conserved group of insect gustatory receptors. *Proceedings of the National*  
928 *Academy of Sciences of the United States of America*. 2014; 111: 1598-1603. doi:  
929 10.1073/pnas.1311724111.
- 930 16. Fu Q, Zhang Z, Hu C, Lai F, Sun Z. A chemically defined diet enables continuous  
931 rearing of the brown planthopper, *Nilaparvata lugens* (Stal) (Homoptera:  
932 Delphacidae). *Applied Entomology and Zoology*. 2001; 36: 111-116. doi:  
933 10.1303/aez.2001.111.
- 934 17. Kang K, Yang P, Chen L, Pang R, Yu L, Zhou W, Zhu Z, Zhang W. Identification  
935 of putative fecundity-related gustatory receptor genes in the brown planthopper  
936 *Nilaparvata lugens*. *BMC Genomics*. 2018; 19: 970. doi:  
937 10.1186/s12864-018-5391-5.
- 938 18. Kang K, Yue L, Xia X, Liu K, Zhang W. Comparative metabolomics analysis of  
939 different resistant rice varieties in response to the brown planthopper *Nilaparvata*  
940 *lugens* Hemiptera: Delphacidae. *Metabolomics*. 2019; 15: 62. doi:  
941 10.1007/s11306-019-1523-4.
- 942 19. Karatolos N, Hatcher PE. The effect of acetylsalicylic acid and oxalic acid on  
943 *Myzus persicae* and *Aphidius colemani*. *Entomologia Experimentalis et Applicata*.  
944 2008; 130: 98-105. doi: 10.1111/j.1570-7458.2008.00797.x.
- 945 20. Khan ZR, Midega CA, Pittchar JO, Murage AW, Birkett MA, Bruce TJ, Pickett  
946 JA. Achieving food security for one million sub-Saharan African poor through  
947 push-pull innovation by 2020. *Philosophical Transactions of the Royal Society of*  
948 *London. Series B, Biological Sciences*. 2014; 369: 20120284. doi:  
949 10.1098/rstb.2012.0284.
- 950 21. Kim H, Kim H, Kwon JY, Seo JT, Shin DM, Moon SJ. *Drosophila Gr64e*  
951 mediates fatty acid sensing via the phospholipase C pathway. *PLoS Genetics*.  
952 2018; 14: e1007229. doi: 10.1371/journal.pgen.1007229.
- 953 22. Lee Y, Kim S, Montell C. Avoiding DEET through insect gustatory receptors.  
954 *Neuron*. 2010; 67: 555-561. doi: 10.1016/j.neuron.2010.07.006.
- 955 23. Lee Y, Moon SJ, Montell C. Multiple gustatory receptors required for the caffeine  
956 response in *Drosophila*. *Proceedings of the National Academy of Sciences of the*  
957 *United States of America*. 2009; 106: 4495-4500. doi: 10.1073/pnas.0811744106.
- 958 24. Liman ER, Zhang YV, Montell C. Peripheral coding of taste. *Neuron*. 2014; 81:  
959 984-1000. doi: 10.1016/j.neuron.2014.02.022.
- 960 25. Massonie G. Breeding of a biotype of *Myzus persicae* Sulzer on a synthetic  
961 medium. V. Influence of oxalic and gentisic acids on the nutritive value of a  
962 synthetic medium. *Annales De La Nutrition Et De L'alimentation*. 1980; 34:  
963 139-146.

26. Moon SJ, Kottgen M, Jiao Y, Xu H, Montell C. A taste receptor required for the caffeine response *in vivo*. *Current Biology*. 2006; 16: 1812-1817. doi: 10.1016/j.cub.2006.07.024.
27. Nelson G, Hoon MA, Chandrashekar J, Zhang YF, Ryba NJP, Zuker CS. Mammalian sweet taste receptors. *Cell*. 2001; 106: 381–390. doi: 10.1016/s0092-8674(01)00451-2.
28. Ozaki K, Ryuda M, Yamada A, Utoguchi A, Ishimoto H, Calas D, Yoshikawa H. A gustatory receptor involved in host plant recognition for oviposition of a swallowtail butterfly. *Nature Communications*. 2011; 2: 542. doi: 10.1038/ncomms1548.
29. Poudel S, Kim Y, Kim YT, Lee Y. Gustatory receptors required for sensing umbelliferone in *Drosophila melanogaster*. *Insect Biochemistry and Molecular Biology*. 2015; 66: 110-118. doi: 10.1016/j.ibmb.2015.10.010.
30. Poudel S, Kim Y, Kwak JS, Jeong S, Lee Y. Gustatory receptor 22e is essential for sensing chloroquine and strychnine in *Drosophila melanogaster*. *Insect Biochemistry and Molecular Biology*. 2017; 88: 30-36. doi: 10.1016/j.ibmb.2017.07.007.
31. Prokopy RJ, Collier RH, Finch S. Leaf color used by cabbage root flies to distinguish among host plants. *Science*. 1983; 221: 190-192. doi: 10.1126/science.221.4606.190.
32. Rimal S, Sang J, Poudel S, Thakur D, Montell C, Lee Y. Mechanism of acetic acid gustatory repulsion in *Drosophila*. *Cell Reports*. 2019; 26: 1432-1442.e4. doi: 10.1016/j.celrep.2019.01.042.
33. Robertson HM, Wanner KW. The chemoreceptor superfamily in the honey bee, *Apis mellifera*: Expansion of the odorant, but not gustatory, receptor family. *Genome Research*. 2006; 16: 1395-1403. doi: 10.1101/gr.5057506.
34. Sang J, Rimal S, Lee Y. Gustatory receptor 28b is necessary for avoiding saponin in *Drosophila melanogaster*. *EMBO Reports*. 2019; 20: e47328. doi: 10.15252/embr.201847328.
35. Sato K, Tanaka K, Touhara K. Sugar-regulated cation channel formed by an insect gustatory receptor. *Proceedings of the National Academy of Sciences of the United States of America*. 2011; 108: 11680-11685. doi: 10.1073/pnas.1019622108.
36. Scott K. Gustatory processing in *Drosophila melanogaster*. *Annual Review of Entomology*. 2018; 63: 15-30. doi: 10.1146/annurev-ento-020117-043331.
37. Shim J, Lee Y, Jeong YT, Kim Y, Lee MG, Montell C, Moon SJ. The full repertoire of *Drosophila* gustatory receptors for detecting an aversive compound. *Nature Communications*. 2015; 6: 8867. doi: 10.1038/ncomms9867.
38. Sogawa K, Pathak MD. Mechanisms of brown planthopper resistance in Mudgo variety of rice (Hemiptera: Delphacidae). *Applied Entomology and Zoology*. 1970; 5: 145-158. doi: 10.1303/aez.5.145.
39. Sogawa K. The rice brown planthopper: feeding physiology and host plant interactions. *Annual Review of Entomology*. 1982; 27: 49-73. doi: 10.1146/annurev.en.27.010182.000405.



- 1008 40. Stanley M, Ghosh B, Weiss ZF, Christiaan J, Gordon MD. Mechanisms of lactic  
1009 acid gustatory attraction in *Drosophila*. *Current Biology*. 2021; 31: 3525-3537.e6.  
1010 doi: 10.1016/j.cub.2021.06.005.
- 1011 41. Sun L, Hou W, Zhang J, Dang Y, Yang Q, Zhao X, Ma Y, Tang Q. Plant  
1012 metabolites drive different responses in caterpillars of two closely related  
1013 *Helicoverpa* species. *Front Physiology*. 2021; 12: 662978. doi:  
1014 10.3389/fphys.2021.662978.
- 1015 42. Wienken CJ, Baaske P, Rothbauer U, Braun D, Duhr S. Protein-binding assays in  
1016 biological liquids using microscale thermophoresis. *Nature Communications*.  
1017 2010; 1: 100. doi: 10.1038/ncomms1093.
- 1018 43. Wu B, Huang S, Li C, Sun Z, Zhou J, Ling Y, Jiang X, Huang X, Long L, Huang  
1019 F. Effect of environmental factor on secondary substances of rice planting and  
1020 relationship with resistance to brown planthopper (Homoptera: Delphacidae).  
1021 *Southwest China Journal of Agricultural Sciences*. 2016; 29: 2371-2378.
- 1022 44. Xu W, Papanicolaou A, Zhang H, Anderson A. Expansion of a bitter taste receptor  
1023 family in a polyphagous insect herbivore. *Scientific Reports*. 2016; 6: 23666. doi:  
1024 10.1038/srep23666.
- 1025 45. Yang J, Guo H, Jiang NJ, Tang R, Li GC, Huang LQ, van Loon JJA, Wang CZ.  
1026 Identification of a gustatory receptor tuned to sinigrin in the cabbage butterfly  
1027 *Pieris rapae*. 2021; *PLoS Genetics*. 17: 7 e1009527. doi:  
1028 10.1371/journal.pgen.1009527.
- 1029 46. Yoshihara T, Sogawa K, Pathak MD, Juliano BO, Sakamura S. Oxalic acid as a  
1030 sucking inhibitor of the brown planthopper in rice (Delphacidae, Homoptera).  
1031 *Entomologia Experimentalis et Applicata*. 1980; 27: 149-155. doi:  
1032 10.1007/BF00573889.
- 1033 47. Zhang G, Zhang W, Lian B, Gu L, Zhou Q, Liu TX. Insecticidal effects of  
1034 extracts from two rice varieties to brown planthopper, *Nilaparvata lugens*.  
1035 *Journal of Chemical Ecology*. 1999; 25: 1843-1853. doi:  
1036 10.1023/A:1020981716293.
- 1037 48. Zhang HJ, Anderson AR, Trowell SC, Luo AR, Xiang ZH, Xia QY. Topological  
1038 and functional characterization of an insect gustatory receptor. *PLoS One*. 2011; 6:  
1039 e24111. doi: 10.1371/journal.pone.0024111.
- 1040 49. Zhang Z, Cui B, Zhang Y. Electrical penetration graphs indicate that triclin is a  
1041 key secondary metabolite of rice, inhibiting phloem feeding of brown planthopper,  
1042 *Nilaparvata lugens*. *Entomologia Experimentalis et Applicata*. 2015; 156: 14-27.  
1043 doi: 10.1111/eea.12307.
- 1044 50. Zindler-Frank E. Oxalate biosynthesis in relation to photosynthetic pathway and  
1045 plant productivity: a survey. *Zeitschrift Für Pflanzenphysiologie*. 1976; 80: 1-13.  
1046 doi: 10.1016/S0044-328X(76)80044-X.
